# Supplementary material
Source: PubMed Central journal article supplement (PMC5532715)
Supplement: oc7b00112_si_001.pdf [file oc7b00112_si_001.pdf]

## Supporting Information for “Cloud Activation Potentials for Atmospheric $\alpha$ -Pinene and $\beta$ -Caryophyllene Ozonolysis Products”

Ariana Gray Bé,<sup>†</sup> Mary Alice Upshur,<sup>†</sup> Pengfei Liu,<sup>‡</sup> Scot T. Martin,<sup>‡§</sup> Franz M. Geiger,<sup>\*†</sup> and Regan J. Thomson<sup>\*†</sup>

<sup>†</sup> Department of Chemistry, Northwestern University, Evanston, IL 60208, USA

<sup>‡</sup> John A. Paulson School of Engineering and Applied Sciences, Harvard University, Cambridge, MA 02138

<sup>§</sup> Department of Earth and Planetary Sciences, Harvard University, Cambridge, MA 02138

*\*Correspondence to:* Franz M. Geiger (geigerf@chem.northwestern.edu); Regan J. Thomson (r-thomson@northwestern.edu)

### Supporting Information

|                                                                        |     |
|------------------------------------------------------------------------|-----|
| 1. General Methods                                                     | S1  |
| 2. Experimental Procedures for the Synthesis of Oxidation Products     | S2  |
| 3. <sup>1</sup> H and <sup>13</sup> C NMR Spectra                      | S9  |
| 4. Dynamic Surface Tension Experimental Details and Supplementary Data | S34 |

#### 1. General Methods

All reactions were carried out under a nitrogen atmosphere in flame-dried glassware with magnetic stirring unless otherwise stated. THF, Et<sub>2</sub>O and CH<sub>2</sub>Cl<sub>2</sub> were purified by passage through a bed of activated alumina.<sup>1</sup> Reagents were purified prior to use unless otherwise stated following the guidelines of Armarego and Chai.<sup>2</sup> Purification of reaction products was carried out by flash chromatography using EM Reagent silica gel 60 (230-400 mesh). Analytical thin layer chromatography was performed on EM Reagent 0.25 mm silica gel 60-F plates. Visualization was accomplished with UV light and anisaldehyde stain, ceric ammonium molybdate stain, or potassium permanganate stain followed by heating. Infrared spectra were recorded at 0.6 cm<sup>-1</sup> resolution using a Bruker Tensor ATR spectrometer. <sup>1</sup>H-NMR spectra were recorded on a Bruker Avance III 500 (500 MHz) or a Varian Inova 400 (400 MHz) spectrometer and are reported in ppm using solvent as an internal standard (CDCl<sub>3</sub> at 7.26 ppm or CD<sub>3</sub>OD at 3.31 ppm). Data are reported as (app = apparent, obs = obscured, s = singlet, d = doublet, t = triplet, q = quartet, p = pentet, h = hextet, sep = septet, o = octet, m = multiplet, b = broad; coupling constant(s) in Hz; integration. Proton-decoupled <sup>13</sup>C-NMR spectra were recorded on a Bruker Avance III 500 (500 MHz) spectrometer and are reported in ppm using solvent as an internal standard (CDCl<sub>3</sub> at 77.16 ppm or CD<sub>3</sub>OD at 49.00 ppm). Mass spectrometric data were obtained on an Agilent 6210 Time-of-Flight LC/MS and a Thermo Finnegan Mat 900 XL High Resolution Magnetic Sector.

## 2. Experimental Procedures for the Synthesis of Oxidation Products

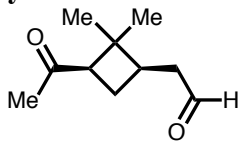

**2-((1*R*,3*R*)-3-acetyl-2,2-dimethylcyclobutyl)acetaldehyde [pinonaldehyde] (1):** Ozone (generated at 110 V) was bubbled through a solution of (–)- $\alpha$ -pinene (10.0 g, 73.4 mmol) in dichloromethane (250 mL) at  $-78$  °C for 35 minutes. At this time,  $O_2$  was bubbled through solution for an additional 20 minutes. After addition of dimethyl sulfide (60 mL, 832 mmol), mixture was then allowed to warm to room temperature and stirred for an additional 16 hours. The mixture was then diluted with  $H_2O$  (100 mL) and transferred to a separatory funnel. The resulting mixture was extracted with  $CH_2Cl_2$  (3 x 100 mL) and washed with brine (100 mL). The combined organics were dried using  $MgSO_4$  and solvent concentrated under reduced pressure to afford the crude product as a light yellow oil. Flash column chromatography on silica gel using 10%  $\rightarrow$  30% EtOAc in hexanes as the eluent afforded the title compound (8.3 g, 49.3 mmol, 67% yield) as a clear oil. A small amount of material (1.19 g, 7.07 mmol) was further purified by distillation (80  $\rightarrow$  120 °C) under reduced pressure to obtain higher purity samples for analytical measurements: IR (neat) 2954, 2826, 2724, 1720, 1701, 1369, 1181  $cm^{-1}$ ;  $^1H$  NMR (500 MHz,  $CDCl_3$ )  $\delta$  9.74 (s, 1H), 2.92 (dd,  $J = 10.0, 7.7$  Hz, 1H), 2.53 – 2.37 (m, 3H), 2.04 (s, 3H), 2.02 – 1.90 (m, 2H), 1.34 (s, 3H), 0.84 (s, 3H);  $^{13}C$  NMR (125 MHz,  $CDCl_3$ )  $\delta$  207.5, 201.5, 54.5, 45.3, 43.4, 35.9, 30.5, 30.3, 22.9, 17.8; HRMS (ESI): Exact mass calcd for  $C_{10}H_{16}O_2$   $[M+H]^+$ , 169.1229. Found 169.1223.

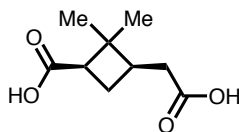

**(1'*R*,3'*R*)-2-(3'-carboxy-2',2'-dimethylcyclobutyl)acetic acid [pinic acid] (3):** Ozone (generated at 110 V) was bubbled through a solution of (–)-myrtenal (2.1 g, 14.0 mmol) in dichloromethane (125 mL) at  $-78$  °C for 30 minutes. At this time,  $O_2$  was bubbled through solution for an additional 20 minutes. The resulting reaction mixture was then allowed to warm to room temperature and solvent concentrated under reduced pressure. After diluting with EtOH (100 mL),  $AgNO_3$  (2.7 g, 15.9 mmol) added and mixture was allowed to stir at room temperature until  $AgNO_3$  was dissolved. At this time, aqueous NaOH solution (4.6 M, 15 mL) was added dropwise and mixture was then allowed to stir at room temperature for an additional 16 hours. The reaction mixture was then vacuum filtered, rinsing with EtOH (25 mL), and filtrate concentrated under reduced pressure. Resulting residue was then diluted with EtOAc (100 mL) and 2 M HCl (100 mL) and transferred to a separatory funnel. The mixture was extracted with EtOAc (3 x 100 mL) and dried over  $MgSO_4$ . Subsequent concentration under reduced pressure afforded the crude product as a light yellow oil. Flash column chromatography on silica gel using 50% EtOAc in hexanes as the eluent afforded the title compound (2.50 g, 13.4 mmol, 96% yield). A small amount of material (90 mg, 0.48 mmol) was further purified via flash column chromatography on silica gel with 5% MeOH in  $CH_2Cl_2$  as the eluent to obtain higher purity samples for analytical measurements: IR (neat) 3384-2537, 2962, 1719, 1689, 1407, 1246, 906  $cm^{-1}$ ;  $^1H$  NMR (500 MHz,  $CD_3OD$ )  $\delta$  2.75 (dd,  $J = 10.4, 7.8$  Hz, 1H), 2.41 – 2.31 (m, 2H), 2.31 – 2.21 (m, 1H), 2.11 – 2.02 (m, 1H), 1.91 – 1.83 (m, 1H), 1.23 (s, 3H), 0.98 (s, 3H);  $^{13}C$  NMR

(125 MHz, CD<sub>3</sub>OD)  $\delta$  176.6, 176.5, 47.3, 43.4, 39.6, 36.2, 30.3, 25.6, 17.9; HRMS (ESI): Exact mass calcd for C<sub>9</sub>H<sub>14</sub>O<sub>4</sub> [M+Na]<sup>+</sup>, 209.0790. Found 209.0786.

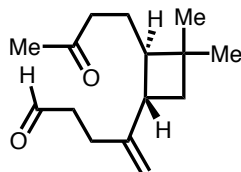

**4-((1*S*,2*R*)-3,3-dimethyl-2-(3-oxobutyl)cyclobutyl)pent-4-enal [ $\beta$ -caryophyllene aldehyde] (4):** Ozone (generated at 70 V) was bubbled through a solution of  $\beta$ -caryophyllene (3.0 g, 14.7 mmol) in dichloromethane (250 mL) at -78 °C for 10 minutes. At this time, O<sub>2</sub> was bubbled through solution for an additional 20 minutes. After addition of dimethyl sulfide (18 mL, 250 mmol), mixture was then allowed to warm to room temperature and stirred for an additional 16 hours. The mixture was then diluted with H<sub>2</sub>O (100 mL) and transferred to a separatory funnel. The resulting mixture was extracted with CH<sub>2</sub>Cl<sub>2</sub> (3 x 100 mL) and washed with brine (100 mL). The combined organics were dried using MgSO<sub>4</sub> and solvent concentrated under reduced pressure to afford the crude product as a light yellow oil. Flash column chromatography on silica gel using 10% EtOAc in hexanes as the eluent afforded the title compound (422 mg, 1.8 mmol, 12% yield) as a clear oil: IR (neat) 3082, 2950, 2863, 2721, 1714, 1643, 1364, 889 cm<sup>-1</sup>; <sup>1</sup>H NMR (500 MHz, CDCl<sub>3</sub>)  $\delta$  9.77 (s, 1H), 4.80 – 4.76 (m, 1H), 4.68 (d, *J* = 1.7 Hz, 1H), 2.56 (td, *J* = 7.8, 7.4, 1.7 Hz, 2H), 2.45 – 2.27 (m, 5H), 2.11 (s, 3H), 1.88 (dt, *J* = 9.6, 7.6 Hz, 1H), 1.81 (dd, *J* = 10.4, 8.5 Hz, 1H), 1.67 – 1.60 (m, 2H), 1.44 (t, *J* = 10.2 Hz, 1H), 1.05 (s, 3H), 1.04 (s, 3H); <sup>13</sup>C NMR (125 MHz, CDCl<sub>3</sub>)  $\delta$  208.9, 202.3, 150.8, 107.7, 47.9, 42.1, 42.0, 41.8, 39.9, 33.8, 31.2, 30.1, 26.7, 24.7, 22.5. HRMS (ESI): Exact mass calcd for C<sub>15</sub>H<sub>24</sub>O<sub>2</sub> [M+H]<sup>+</sup>, 237.1855. Found 237.1851.

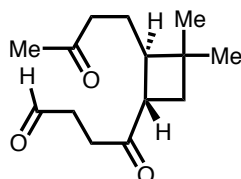

**4-[(1*S*,2*R*)-3,3-dimethyl-2-(3-oxidanylidenebutyl)cyclobutyl]-4-oxidanylidene-butanal ( $\beta$ -nocaryophyllone aldehyde) (5):** Ozone (generated at 110 V) was bubbled through a solution of  $\beta$ -caryophyllene (6.3 g, 24.5 mmol) in methanol (85 mL) at -78 °C for 30 minutes. At this time, O<sub>2</sub> was bubbled through solution for an additional 20 minutes. After addition of dimethyl sulfide (26.3 g, 31 mL, 0.423 mol), mixture was then allowed to warm to room temperature and stirred for an additional 16 hours. The mixture was then diluted with H<sub>2</sub>O (100 mL) and transferred to a separatory funnel. The resulting mixture was extracted with CH<sub>2</sub>Cl<sub>2</sub> (3 x 100 mL) and washed with brine (100 mL). The combined organics were dried using MgSO<sub>4</sub> and solvent concentrated under reduced pressure to afford the crude product as a light yellow oil. Flash column chromatography on silica gel using 20% EtOAc in hexanes as the eluent afforded the title compound (2.8 g, 11.7 mmol, 48% yield) as a clear oil. A small amount of material (0.763 g, 3.20 mmol) was further purified by flash column chromatography on silica gel using 10% to 30% EtOAc in hexanes as the eluent to obtain higher purity samples for analytical measurements: IR (neat) 2951, 2865, 2727, 1703, 1363, 1165, 1113 cm<sup>-1</sup>; <sup>1</sup>H NMR (500 MHz,

CDCl<sub>3</sub>) δ 9.80 (s, 1H), 2.89 – 2.58 (m, 5H), 2.42 – 2.30 (m, 2H), 2.17 – 2.12 (m, 1H), 2.11 (s, 3H), 1.88 (ddd, *J* = 10.7, 9.0, 0.8 Hz, 1H), 1.74 (t, *J* = 10.2 Hz, 1H), 1.70 – 1.56 (m, 2H), 1.06 (s, 3H), 1.04 (s, 3H); <sup>13</sup>C NMR (125 MHz, CDCl<sub>3</sub>) δ 210.0, 208.9, 200.6, 46.9, 46.0, 41.7, 37.5, 36.9, 34.1, 32.9, 30.2, 30.1, 23.9, 22.6; HRMS (ESI): Exact mass calcd for C<sub>14</sub>H<sub>22</sub>O<sub>3</sub> [M+H]<sup>+</sup>, 239.1647. Found 239.1644.

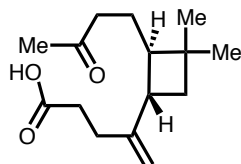

**4-((1*S*,2*R*)-3,3-dimethyl-2-(3-oxobutyl)cyclobutyl)pent-4-enoic acid [β-caryophyllonic acid] (6):** Ozone (generated at 70 V) was bubbled through a solution of β-caryophyllene (3.0 g, 14.7 mmol) in dichloromethane (250 mL) at -78 °C for 10 minutes. At this time, O<sub>2</sub> was bubbled through solution for an additional 20 minutes. Resulting reaction mixture was then allowed to warm to room temperature and solvent concentrated under reduced pressure. After diluting with EtOH (200 mL), AgNO<sub>3</sub> (3.0 g, 17.6 mmol) added and mixture was allowed to stir at room temperature until AgNO<sub>3</sub> was dissolved. At this time, aqueous NaOH solution (4.6 M, 17 mL) was added dropwise and mixture was then allowed to stir at room temperature for an additional 16 hours. The reaction mixture was then vacuum filtered, rinsing with EtOH (50 mL), and filtrate concentrated under reduced pressure. The resulting residue was then diluted with EtOAc (150 mL) and 1 M HCl (150 mL) and transferred to a separatory funnel. The mixture was extracted with EtOAc (3 x 100 mL) and dried over MgSO<sub>4</sub>. Subsequent concentration under reduced pressure afforded the crude product as a viscous yellow oil. Flash column chromatography on silica gel using 20% EtOAc in hexanes as the eluent afforded the title compound (1.9 g, 7.5 mmol, 51% yield): IR (neat) 3100-2665, 3081, 2950, 1707, 1643, 1382, 1161, 887 cm<sup>-1</sup>; <sup>1</sup>H NMR (500 MHz, CDCl<sub>3</sub>) δ 4.78 (s, 1H), 4.71 (s, 1H), 2.52 – 2.47 (m, 2H), 2.41 – 2.27 (m, 5H), 2.11 (s, 3H), 1.88 (dt, *J* = 9.6, 7.7 Hz, 1H), 1.81 (dd, *J* = 2.0, 1.5, 1.3 Hz, 1H), 1.69 – 1.59 (m, 2H), 1.45 (t, *J* = 10.2 Hz, 1H), 1.05 (s, 3H), 1.04 (s, 3H); <sup>13</sup>C NMR (125 MHz, CDCl<sub>3</sub>) δ 209.1, 178.8, 150.7, 107.5, 47.9, 42.1, 41.8, 39.8, 33.8, 32.5, 31.2, 30.0, 29.1, 24.7, 22.5; HRMS (ESI): Exact mass calcd for C<sub>15</sub>H<sub>24</sub>O<sub>3</sub> [M+Na]<sup>+</sup>, 275.1623. Found 275.1626.

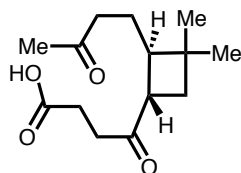

**4-oxo-4-[(1*S*)-3,3-dimethyl-2*t*-(3-oxo-butyl)-cyclobutyl-(*r*)]-butyric acid [β-nocaryophyllonic acid] (7):** Ozone (generated at 110 V) was bubbled through a solution of β-caryophyllene (3.5 g, 17.1 mmol) in dichloromethane (250 mL) at -78 °C for 1 hour. At this time, O<sub>2</sub> was bubbled through solution for an additional 20 minutes. Resulting reaction mixture was then allowed to warm to room temperature and solvent concentrated under reduced pressure. After diluting with EtOH (60 mL), AgNO<sub>3</sub> (3.4 g, 19.8 mmol) added and mixture was allowed to stir at room temperature until AgNO<sub>3</sub> was dissolved. At this time, aqueous NaOH solution (4.6 M, 13 mL) was added dropwise and mixture was then allowed to stir at room temperature for an additional 16 hours. Reaction mixture was then vacuum filtered, rinsing with EtOH (50 mL), and filtrate

concentrated under reduced pressure. The resulting residue was then diluted with EtOAc (150 mL) and 1 M HCl (150 mL) and transferred to a separatory funnel. The mixture was extracted with EtOAc (3 x 100 mL) and dried over MgSO<sub>4</sub>. Subsequent concentration under reduced pressure afforded the crude product as a highly viscous oil. Flash column chromatography on silica gel using 20% to 40% EtOAc in hexanes as the eluent afforded the title compound (3.9 g, 14.5 mmol, 85% yield): IR (neat) 3038-2654, 2951, 2865, 1737, 1701, 1366, 1163 cm<sup>-1</sup>; <sup>1</sup>H NMR (500 MHz, CDCl<sub>3</sub>) δ 2.83 – 2.57 (m, 5H), 2.41 – 2.27 (m, 2H), 2.15 – 2.10 (m, 1H), 2.09 (s, 3H), 1.85 (dd, *J* = 10.7, 9.1 Hz, 1H), 1.71 (t, *J* = 10.2 Hz, 1H), 1.67 – 1.52 (m, 2H), 1.04 (s, 3H), 1.02 (s, 3H); <sup>13</sup>C NMR (125 MHz, CDCl<sub>3</sub>) δ 210.1, 209.3, 178.6, 46.8, 45.9, 41.7, 36.8, 35.0, 34.0, 30.2, 30.1, 27.8, 23.9, 22.6; HRMS (ESI): Exact mass calcd for C<sub>14</sub>H<sub>22</sub>O<sub>4</sub> [M+Na]<sup>+</sup>, 277.1416. Found 277.1413.

**Scheme S1.** Synthetic outline of β-caryophyllinic acid (**8**) and β-nocaryophyllinic acid (**9**).

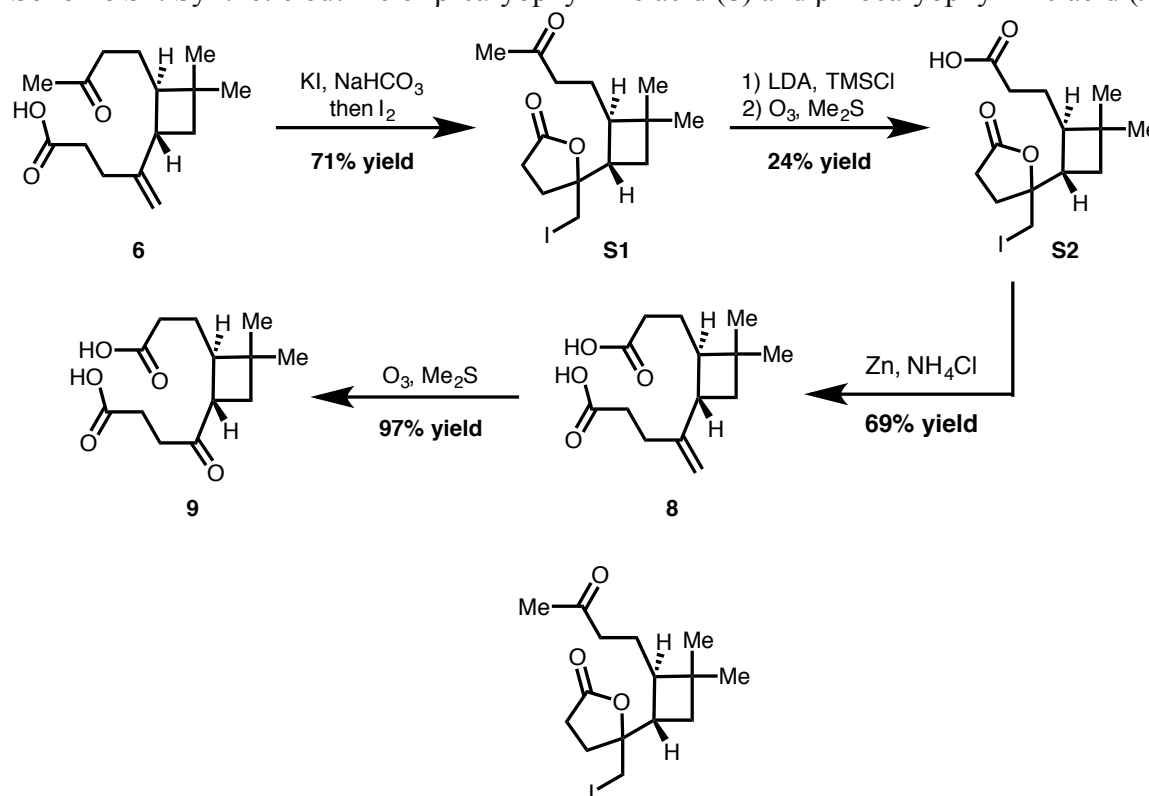

**5-[(1S,2R)-3,3-dimethyl-2-(3-oxobutyl)cyclobutyl]iodomethyl)oxolan-2-one (S1):** To a solution of KI (7.9 g, 47.6 mmol) and NaHCO<sub>3</sub> (2.0 g, 23.8 mmol) in H<sub>2</sub>O (40 mL) at room temperature was added dropwise 4-((1S,2R)-3,3-dimethyl-2-(3-oxobutyl)cyclobutyl)pent-4-enoic acid (**6**) (2.0 g, 7.9 mmol) in CH<sub>2</sub>Cl<sub>2</sub> (8 mL) by cannula. Reaction mixture was allowed to stir vigorously for 20 minutes and then I<sub>2</sub> (1.2 g, 9.5 mmol) was added. After 10 minutes, an additional portion of I<sub>2</sub> (0.50 g, 2.0 mmol) was added and reaction was allowed to stir at room temperature for 16 hours. The reaction mixture was then transferred to a separatory funnel. The organic phase was collected and the aqueous layer extracted with dichloromethane (3 x 50 mL). The combined organics were washed with 10% Na<sub>2</sub>S<sub>2</sub>O<sub>3</sub> (3 x 50 mL) and dried with MgSO<sub>4</sub>. Concentration under reduced pressure and flash column chromatography on silica gel using 20%

EtOAc in hexanes as the eluent afforded the corresponding compound (2.1 g, 5.6 mmol, 71% yield) as a viscous yellow oil. The product was isolated as a mixture of diastereomers and both diastereomers were carried forward to the subsequent reaction: IR (neat) 2952, 2864, 1764, 1702, 1245, 1159, 915  $\text{cm}^{-1}$ ;  $^1\text{H}$  NMR (500 MHz,  $\text{CDCl}_3$ , mixture of diastereomers)  $\delta$  3.43 (d,  $J = 10.7$  Hz), 3.32 (d,  $J = 10.6$  Hz), 3.25 (d,  $J = 10.7$  Hz), 3.21 (d,  $J = 10.6$  Hz), 2.78 – 2.61 (m), 2.60 – 2.50 (m), 2.47 – 2.28 (m), 2.27 – 2.14 (m), 2.12 (s), 2.11 – 1.99 (m), 1.92 (td,  $J = 9.2, 6.2$  Hz), 1.78 (dt,  $J = 9.2, 7.4$  Hz), 1.73 – 1.54 (m), 1.41 (t,  $J = 10.2$  Hz), 1.07 (s), 1.04 (s);  $^{13}\text{C}$  NMR (125 MHz,  $\text{CDCl}_3$ , mixture of diastereomers)  $\delta$  208.3, 208.1, 176.5, 176.4, 86.7, 86.2, 44.6, 44.6, 42.3, 42.2, 41.9, 41.7, 34.3, 34.0, 33.7, 33.5, 31.2, 31.0, 30.3, 30.2, 30.1, 29.7, 29.6, 29.5, 25.1, 25.0, 22.7, 22.6, 14.0, 13.4; HRMS (ESI): Exact mass calcd for  $\text{C}_{15}\text{H}_{23}\text{IO}_3$   $[\text{M}+\text{H}]^+$ , 379.0770. Found 379.0771.

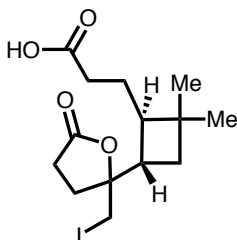

**3-[(1R,4S)-4-[2-iodomethyl]-5-oxoxolan-2-yl]-2,2-dimethylcyclobutyl]propanoic acid (S2):**

To a solution of freshly distilled diisopropylamine (1.0 mL, 7.4 mmol) in THF (30 mL) at 0 °C was added *n*-BuLi (3.6 mL, 5.9 mmol, 1.62 M in hexanes) under  $\text{N}_2$ . After 5 minutes, reaction was cooled to –20 °C and TMSCl (1.3 mL, 9.8 mmol) was added. 5-[(1S,2R)-3,3-dimethyl-2-(3-oxobutyl)cyclobutyl](iodomethyl)oxolan-2-one (S1) (1.9 g, 4.9 mmol) in THF (20 mL) was then added dropwise via cannula. After stirring at –20 °C for 2 hours, the reaction was quenched with triethylamine (5 mL) and diluted with  $\text{NaHCO}_3$  (50 mL). After transferring to a separatory funnel, the mixture was extracted with EtOAc (3 x 100 mL) and washed with brine (50 mL). The combined organics were dried using  $\text{MgSO}_4$  and solvent concentrated under reduced pressure to afford crude 5-[(1S,2R)-3,3-dimethyl-2-[(3-[(trimethylsilyl)oxy]but-3-en-1-yl)cyclobutyl](iodomethyl)oxolan-2-one (2.2 g, 4.9 mmol) as a light yellow oil, which was directly carried over to the next step without further purification. Ozone (generated at 110 V) was bubbled through a solution of 5-[(1S,2R)-3,3-dimethyl-2-[(3-[(trimethylsilyl)oxy]but-3-en-1-yl)cyclobutyl](iodo-methyl)oxolan-2-one (2.2 g, 4.9 mmol) in dichloromethane (125 mL) at –78 °C for 6 minutes. At this time,  $\text{O}_2$  was bubbled through solution for an additional 15 minutes. After addition of dimethyl sulfide (3.9 mL, 53.7 mmol), mixture was then allowed to warm to room temperature and stir for an additional 16 hours. The mixture was then diluted with  $\text{H}_2\text{O}$  (75 mL) and transferred to a separatory funnel. The resulting mixture was extracted with  $\text{CH}_2\text{Cl}_2$  (3 x 75 mL) and washed with brine (75 mL). The combined organics were dried using  $\text{MgSO}_4$  and solvent concentrated under reduced pressure to afford the crude product as a light yellow oil. Flash column chromatography on silica gel using 10% to 15% EtOAc in hexanes as the eluent afforded the title compound (444.2 mg, 1.2 mmol, 24% yield over the two steps) as a light yellow oil. Due to incomplete conversion, the original starting material, 5-[(1S,2R)-3,3-dimethyl-2-(3-oxobutyl)cyclobutyl](iodomethyl)oxolan-2-one (S1), was recovered (1.35 g, 3.57 mmol) and subsequently cycled through the reaction sequence a second time for an overall yield of the product (S2) of 39% (655.4 mg, 1.72 mmol) over the two steps. The product was isolated

as a mixture of diastereomers and both diastereomers were carried forward to the subsequent reaction: IR (neat) 3358-2553, 2951, 2864, 1770, 1706, 1154, 915, 729  $\text{cm}^{-1}$ ;  $^1\text{H}$  NMR (500 MHz,  $\text{CDCl}_3$ , mixture of diastereomers)  $\delta$  3.43 (d,  $J = 10.7$  Hz), 3.33 (d), 3.25 (d,  $J = 10.7$  Hz), 3.21 (d,  $J = 10.6$  Hz), 2.79 – 2.60 (m), 2.58 – 2.47 (m), 2.43 – 2.30 (m), 2.30 – 1.95 (m), 1.91 – 1.69 (m), 1.68 – 1.57 (m), 1.44 (t,  $J = 10.2$  Hz), 1.09 (s), 1.08 (s);  $^{13}\text{C}$  NMR (125 MHz,  $\text{CDCl}_3$ , mixture of diastereomers)  $\delta$  178.2, 178.1, 176.5, 176.4, 86.8, 86.2, 77.2, 44.4, 44.3, 42.2, 42.0, 34.3, 34.1, 33.8, 33.5, 32.3, 32.2, 31.1, 31.0, 30.2, 29.7, 29.7, 29.5, 26.3, 26.2, 22.6, 22.6, 13.6, 13.3; HRMS (ESI): Exact mass calcd for  $\text{C}_{14}\text{H}_{21}\text{O}_4$   $[\text{M}+\text{H}]^+$ , 381.0563. Found 381.0560.

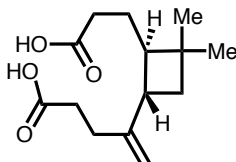

**4-[(1*S*,2*R*)-2-(3-hydroxy-3-oxopropyl)-3,3-dimethyl-cyclobutyl]pent-4-enoic acid ( $\beta$ -caryophyllinic acid) (8):** Zn dust (1.2 g, 17.8 mmol) and  $\text{NH}_4\text{Cl}$  (0.95 g, 17.8 mmol) were added to a solution of 3-[(1*R*,4*S*)-4-[2-iodomethyl]-5-oxoxolan-2-yl]-2,2-dimethylcyclobutyl]propanoic acid (**S2**) (444.2 mg, 1.2 mmol) in EtOH (19 mL). The reaction mixture was heated under reflux for 1 hour. After cooling to room temperature, the reaction mixture was vacuum filtered, rinsing with acetone (25 mL), and solvent concentrated under reduced pressure to afford the crude product as a dark yellow oil. The reaction was repeated on the same scale and crude products were combined prior to purification. Flash column chromatography on silica gel with 5% MeOH and 0.1% AcOH in  $\text{CH}_2\text{Cl}_2$  as the eluent afforded the title compound (383.2 mg, 1.5 mmol, 69% yield from combined crude product) as a yellow oil: IR (neat) 3391-2344, 3080, 2950, 2864, 1704, 1644, 1438, 888  $\text{cm}^{-1}$ ;  $^1\text{H}$  NMR (500 MHz,  $\text{CD}_3\text{OD}$ )  $\delta$  4.81 (s, 1H), 4.74 (s, 1H), 2.51 – 2.38 (m, 3H), 2.35 – 2.15 (m, 4H), 1.98 (dt,  $J = 9.6$ , 7.6 Hz, 1H), 1.83 (dd,  $J = 10.4$ , 8.5 Hz, 1H), 1.76 – 1.63 (m, 2H), 1.46 (t,  $J = 10.2$  Hz, 1H), 1.08 (s, 3H), 1.07 (s, 3H);  $^{13}\text{C}$  NMR (125 MHz,  $\text{CD}_3\text{OD}$ )  $\delta$  177.4, 177.1, 152.5, 107.8, 42.7, 40.8, 34.6, 33.6, 33.4, 31.5, 30.5, 27.1, 22.7; HRMS (ESI): Exact mass calcd for  $\text{C}_{14}\text{H}_{22}\text{O}_4$   $[\text{M}+\text{Na}]^+$ , 277.1416. Found 277.1421.

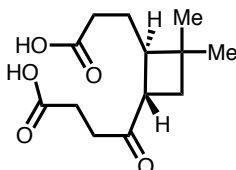

**4-[(1*S*,2*R*)-2-(2-carboxyethyl)-3,3-dimethylcyclobutyl]-4-oxobutanoic acid ( $\beta$ -nocyaryphyllinic acid) (9):** Ozone (generated at 110 V) was bubbled through a solution of 4-[(1*S*,2*R*)-2-(3-hydroxy-3-oxopropyl)-3,3-dimethyl-cyclobutyl]pent-4-enoic acid (**8**) (121.2 mg, 0.5 mmol) in MeOH (22 mL) at  $-78$   $^\circ\text{C}$  for 5 minutes. At this time,  $\text{O}_2$  was bubbled through solution for an additional 15 minutes. After addition of dimethyl sulfide (385  $\mu\text{L}$ , 5.2 mmol), the mixture was allowed to warm to room temperature and stir for an additional 16 hours. The mixture was then diluted with 2 M HCl (10 mL) and transferred to a separatory funnel. The resulting mixture was extracted with EtOAc (3 x 25 mL). The combined organics were dried using  $\text{MgSO}_4$  and solvent concentrated under reduced pressure to afford the crude product as a light yellow oil. Flash column chromatography on silica gel with 5% MeOH in  $\text{CH}_2\text{Cl}_2$  as the

eluent afforded the title compound (118 mg, 0.5 mmol, 97% yield) as a white solid: IR (neat) 2955-2561, 2917, 2866, 1696, 1384, 1286, 951  $\text{cm}^{-1}$ ;  $^1\text{H}$  NMR (500 MHz,  $\text{CD}_3\text{OD}$ )  $\delta$  2.97 – 2.86 (m, 1H), 2.78 – 2.61 (m, 2H), 2.59 – 2.45 (m, 2H), 2.28 – 2.13 (m, 3H), 1.86 (dd,  $J = 10.7$ , 9.0 Hz, 1H), 1.78 – 1.60 (m, 3H), 1.09 (s, 3H), 1.06 (s, 3H);  $^{13}\text{C}$  NMR (125 MHz,  $\text{CD}_3\text{OD}$ )  $\delta$  212.6, 177.2, 176.4, 47.5, 47.2, 37.3, 36.3, 34.7, 33.2, 30.6, 28.6, 26.6, 22.7. HRMS (ESI): Exact mass calcd for  $\text{C}_{13}\text{H}_{20}\text{O}_5$   $[\text{M}+\text{H}]^+$ , 257.1389. Found 257.1384.

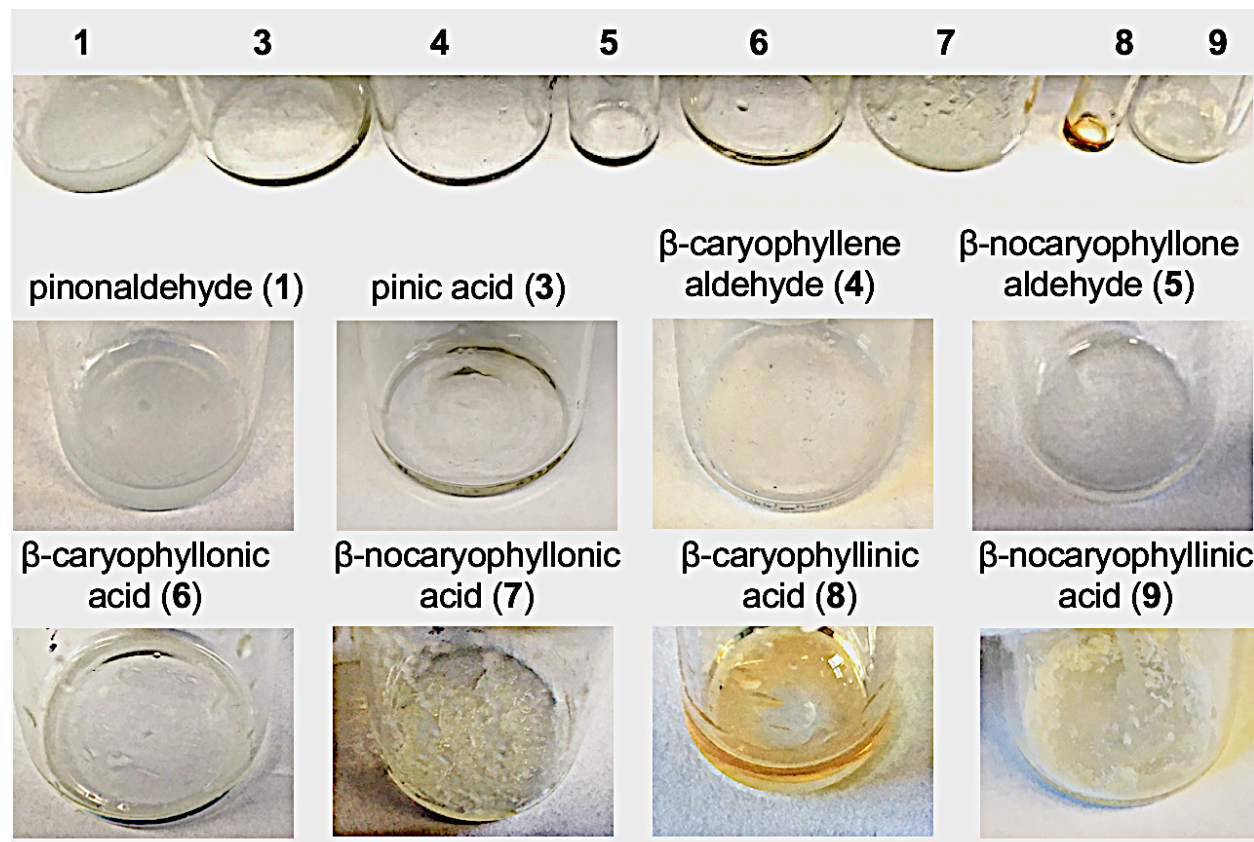

**Figure S1.** Sample pictures highlighting the phase states of all compounds synthesized in this study.



### 3. $^1\text{H}$ and $^{13}\text{C}$ NMR Spectra

#### 3.1 $^1\text{H}$ and $^{13}\text{C}$ NMR Spectra of Synthesized Compounds

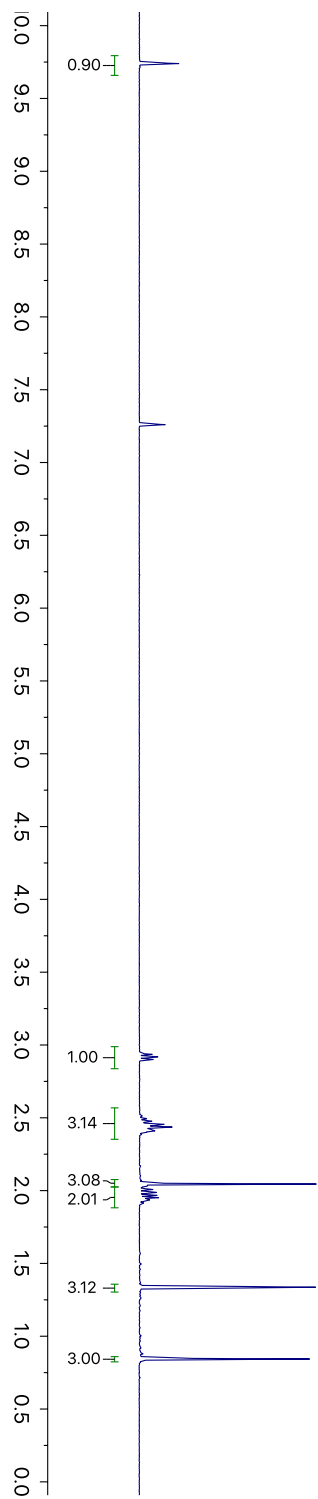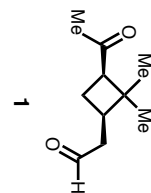

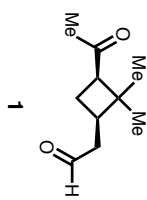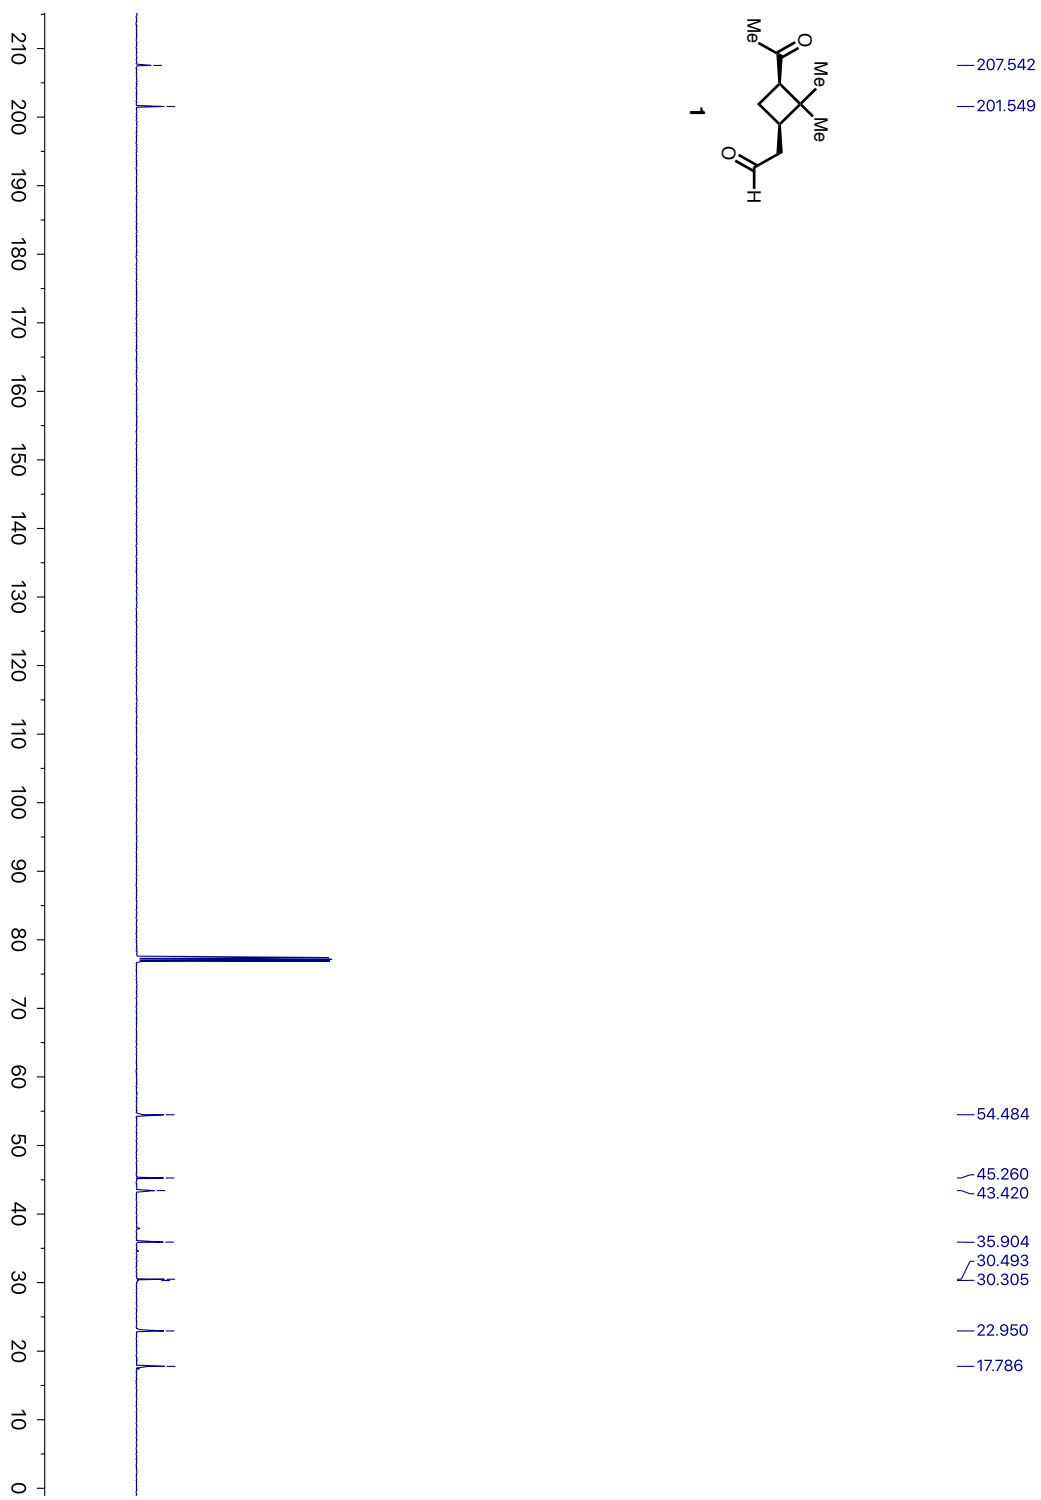

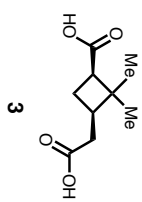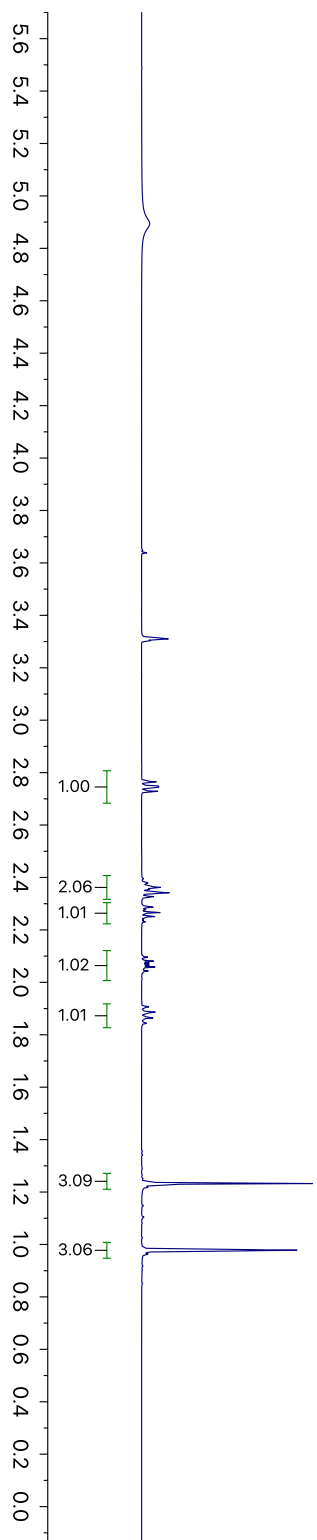

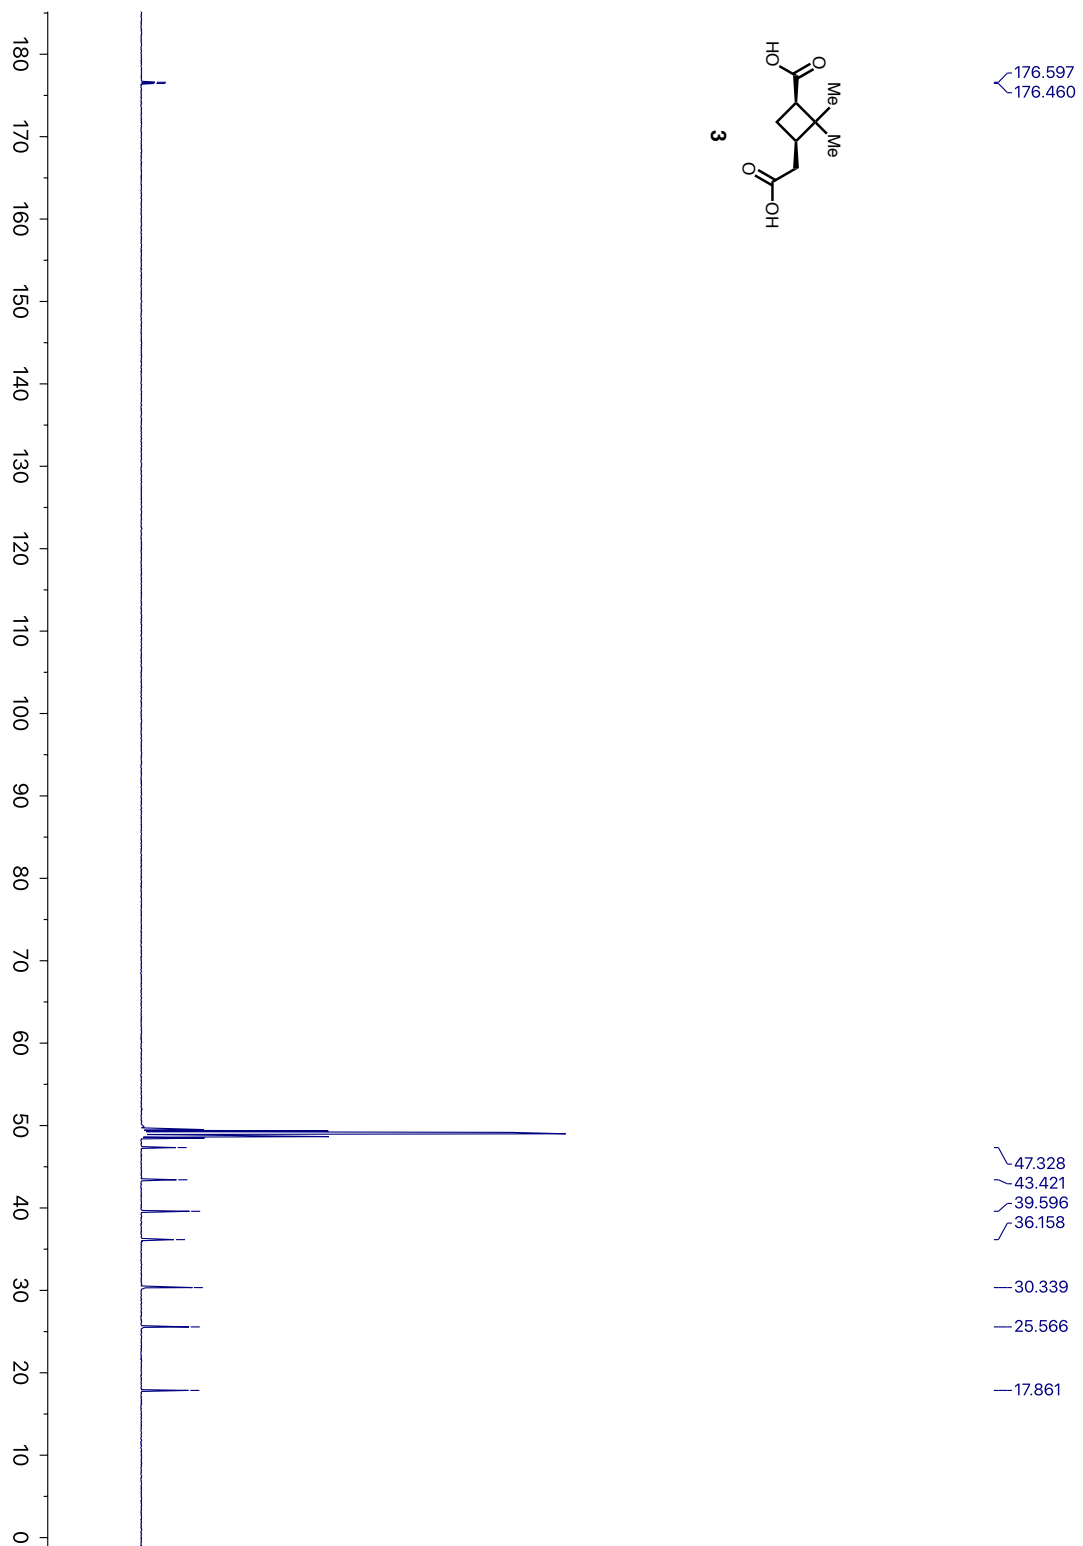

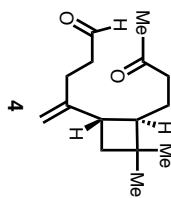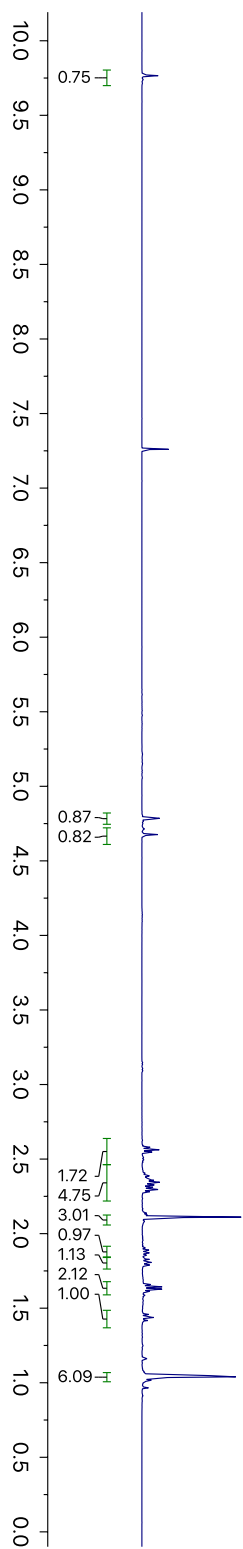

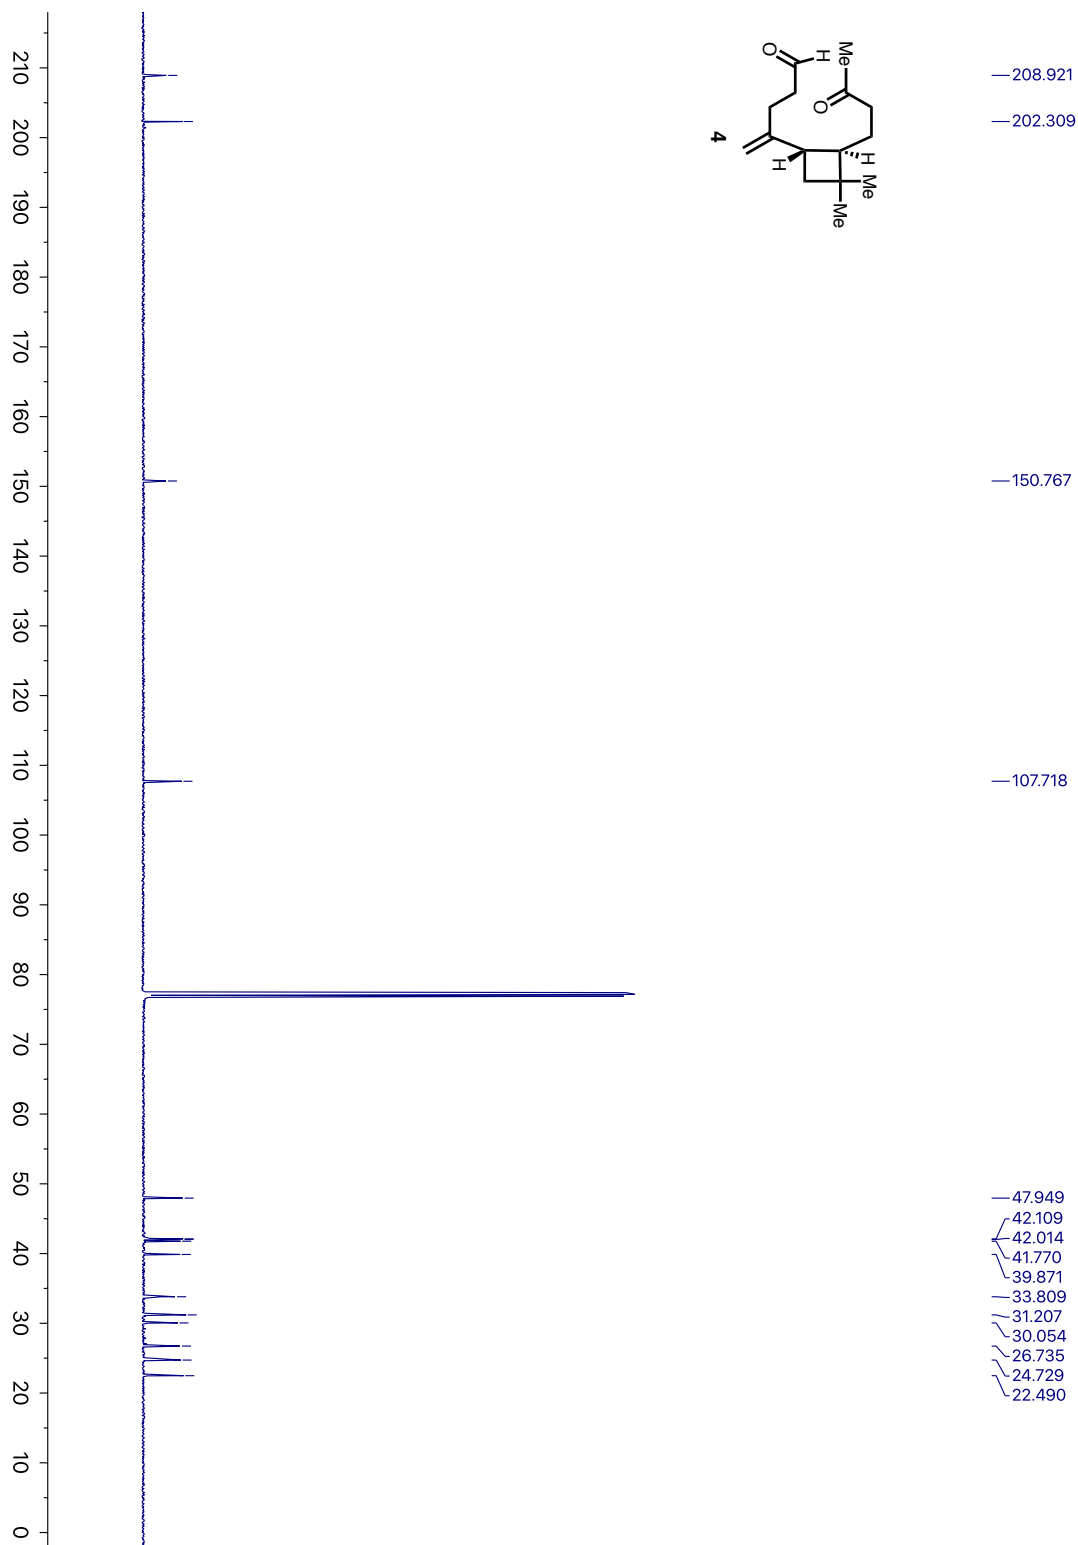

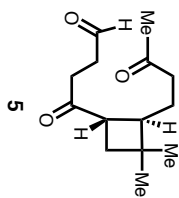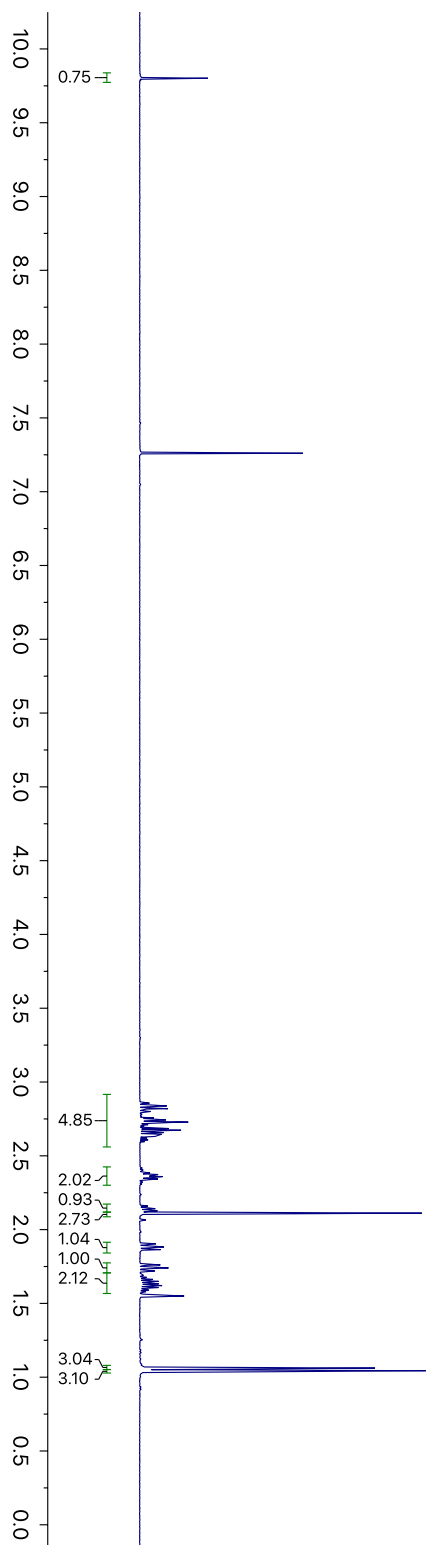

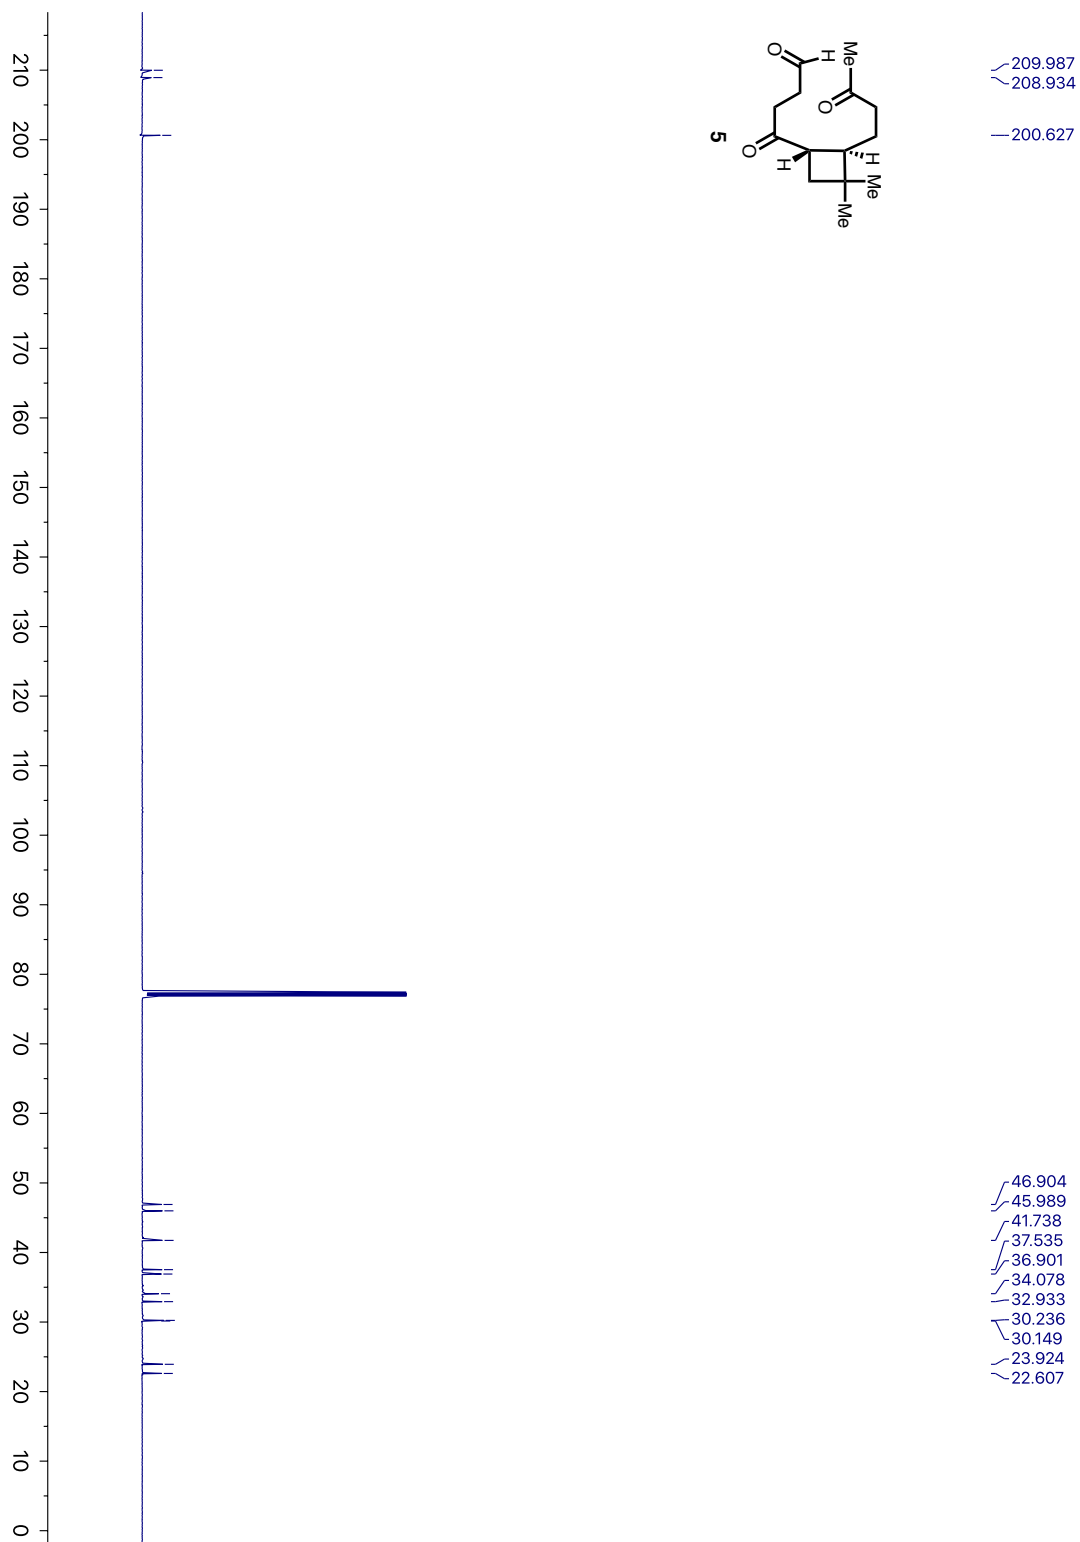



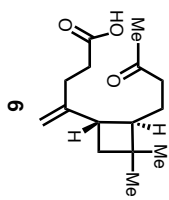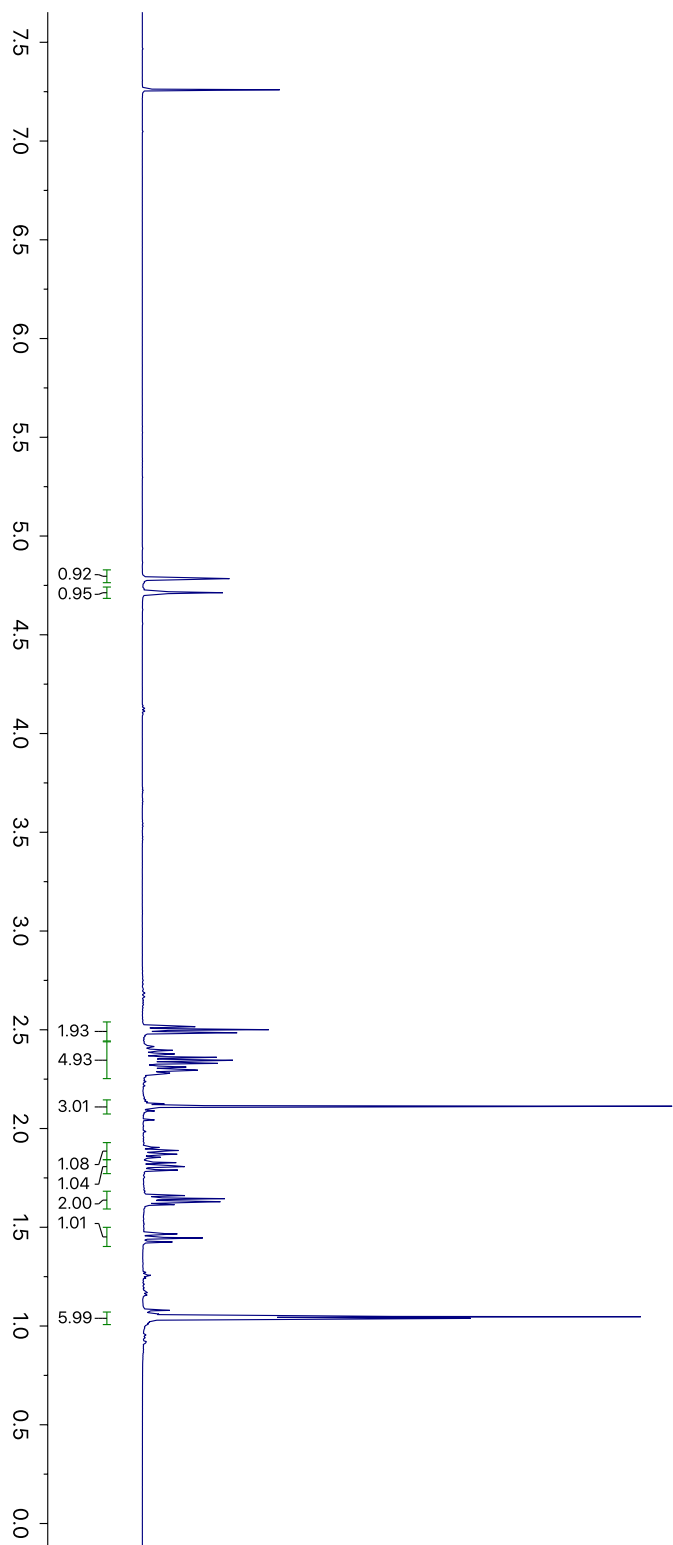

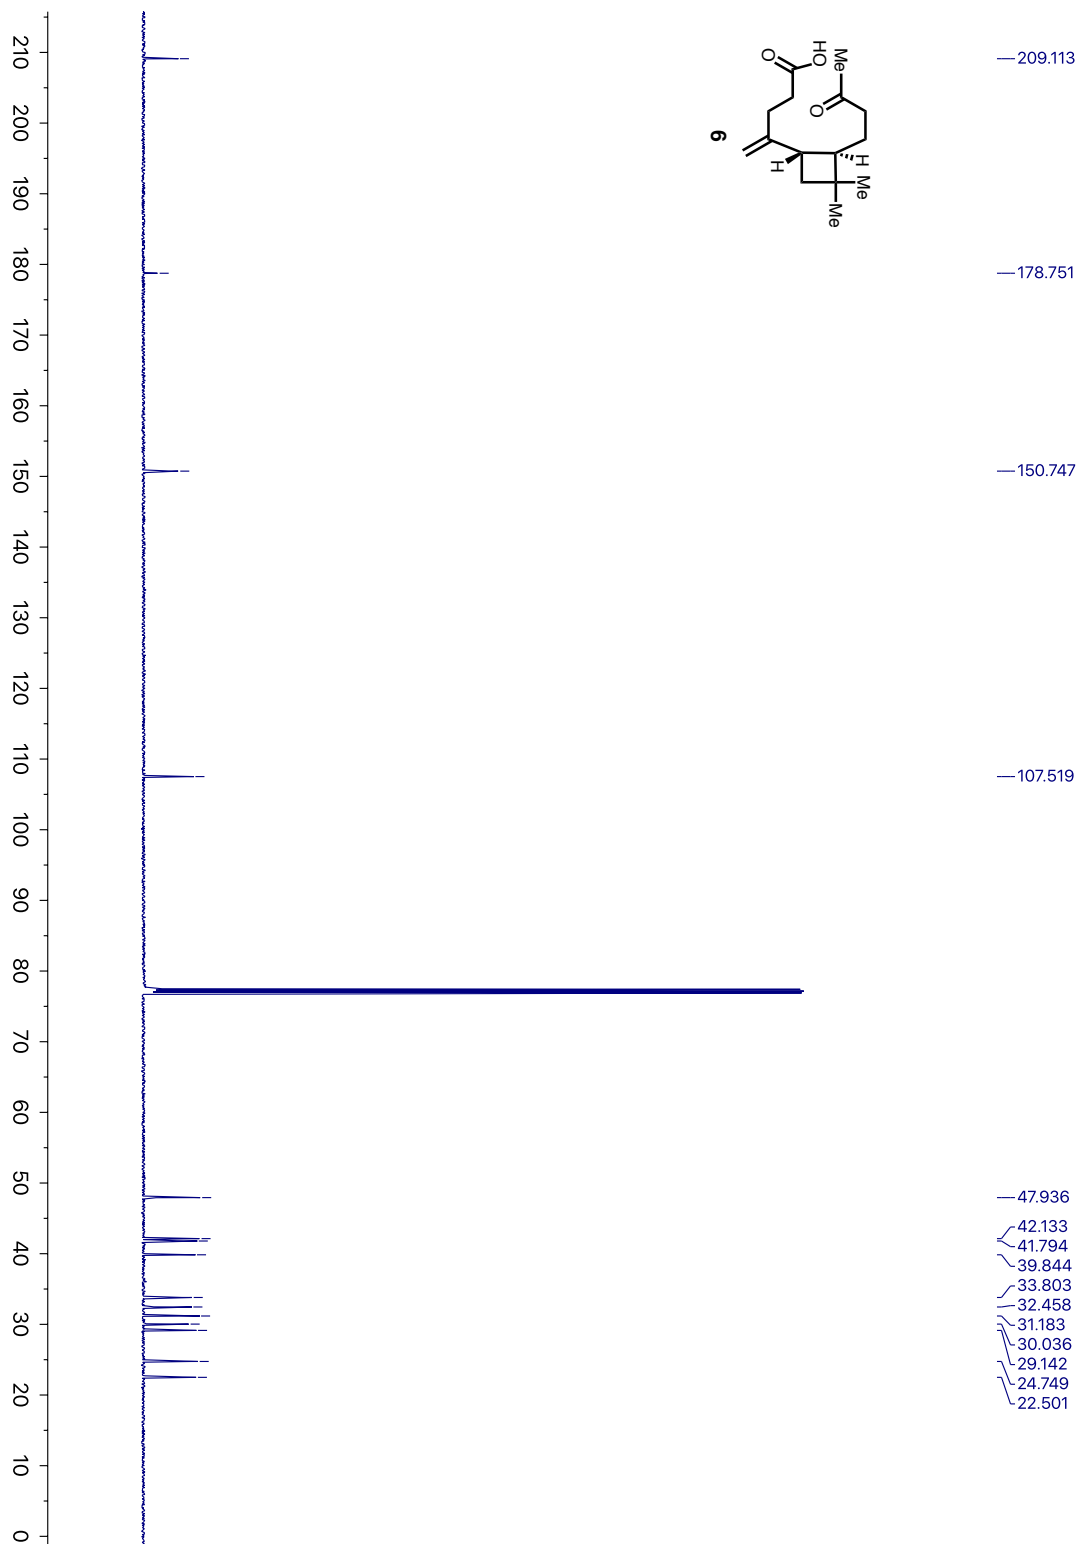

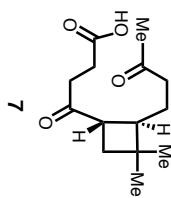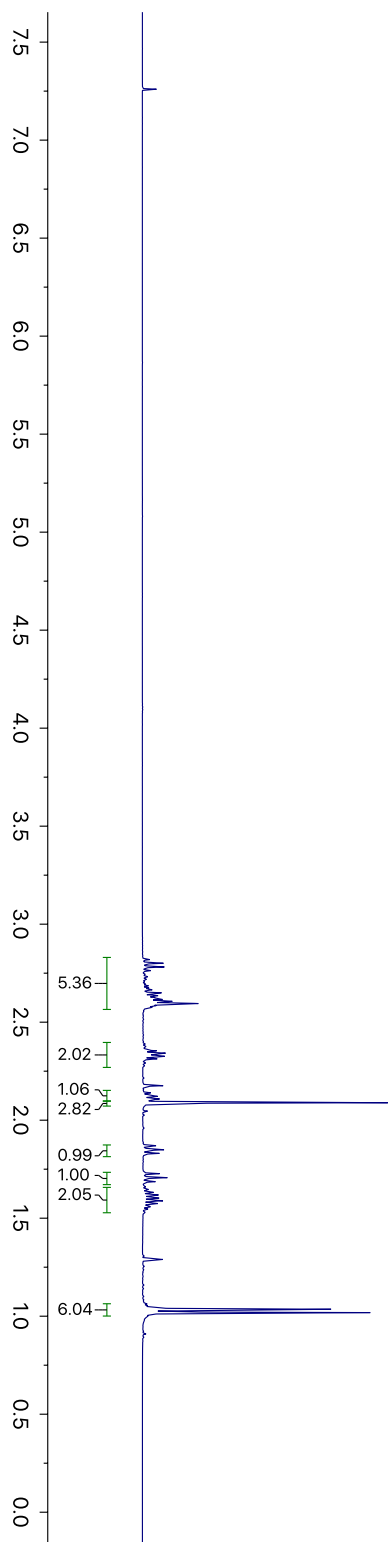

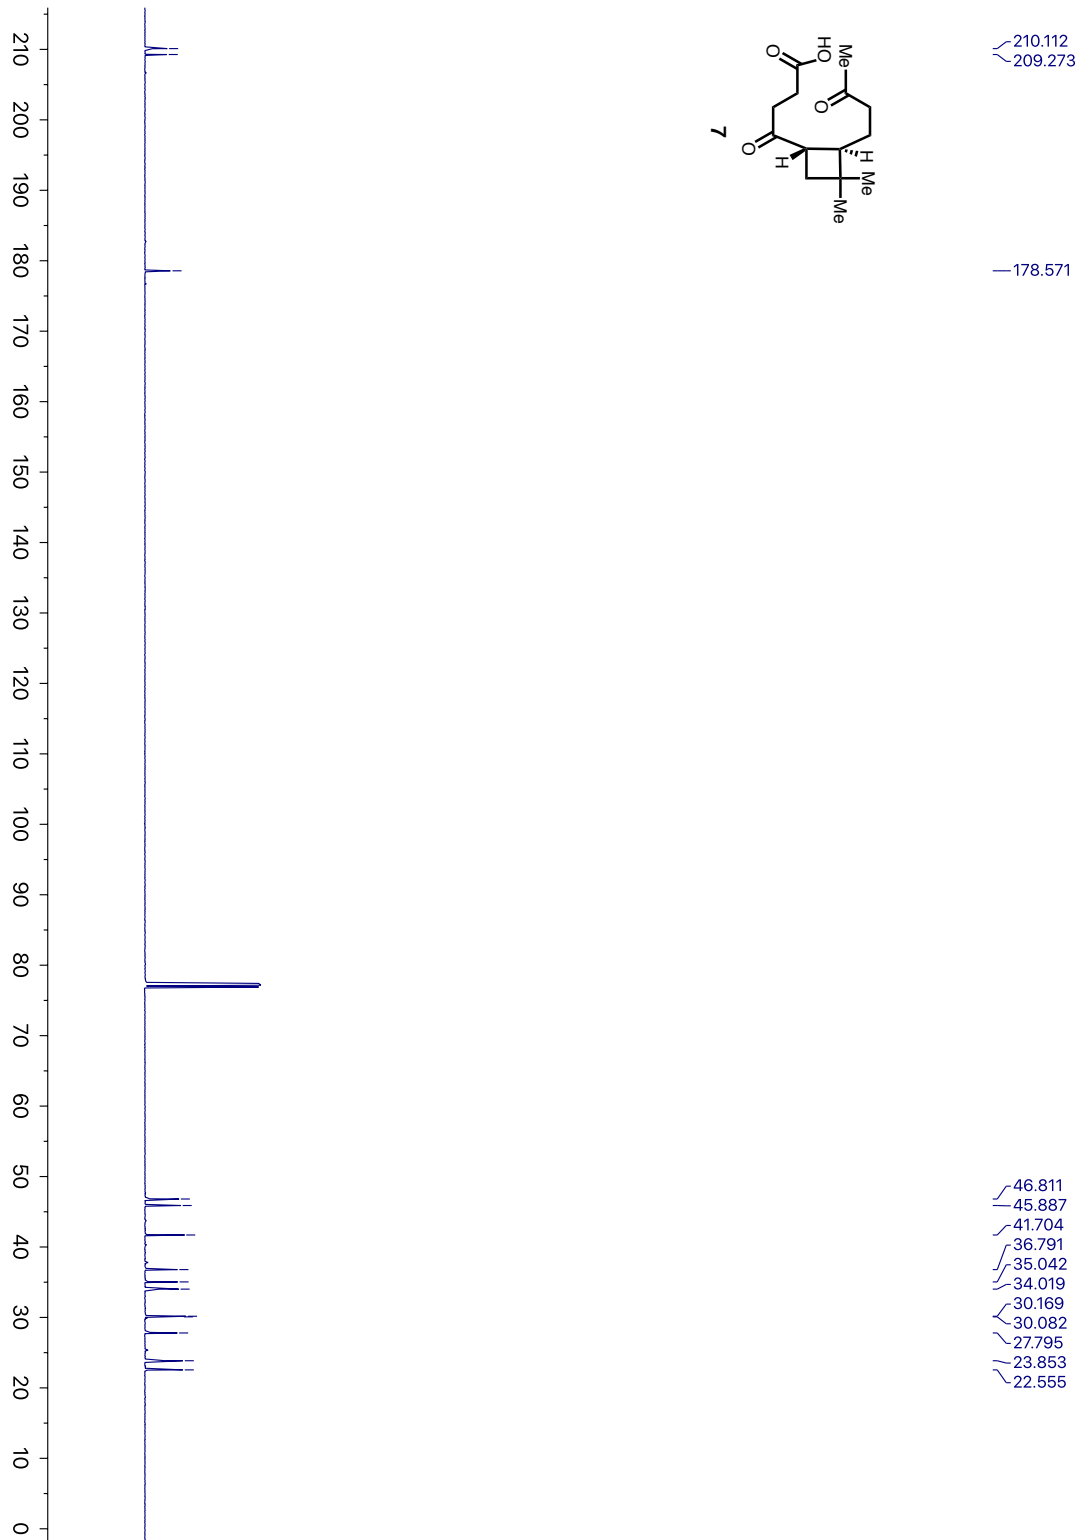

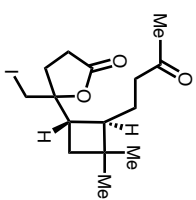

S1

mixture of diastereomers

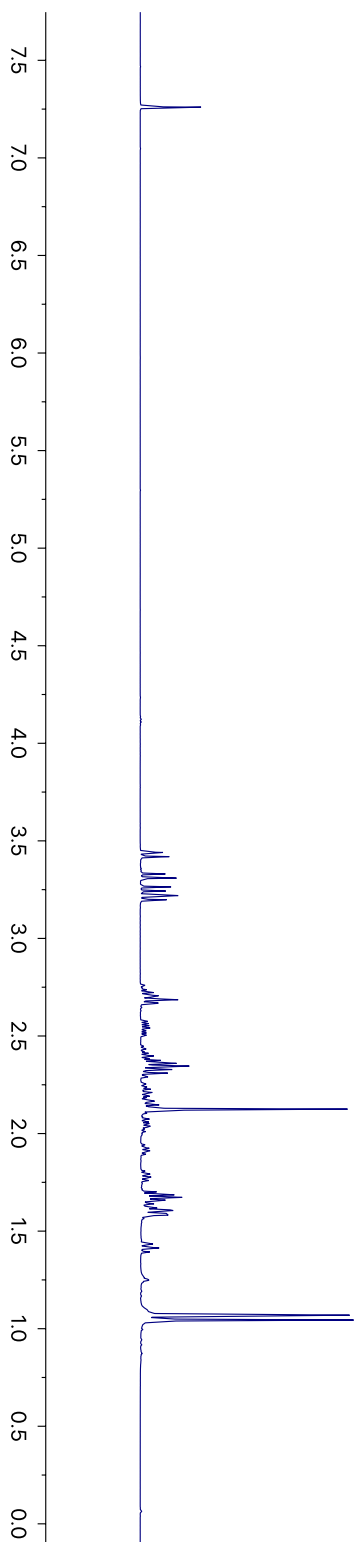

mixture of diastereomers

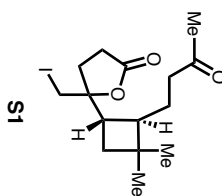

208.327  
208.083

176.484  
176.361

86.703  
86.195

44.638  
44.587  
42.270  
42.238  
41.909  
41.675  
34.335  
34.040  
33.746  
33.473  
31.237  
31.045  
30.282  
30.178  
30.150  
29.709  
29.598  
29.539  
25.114  
24.989  
22.682  
22.612  
13.960  
13.418

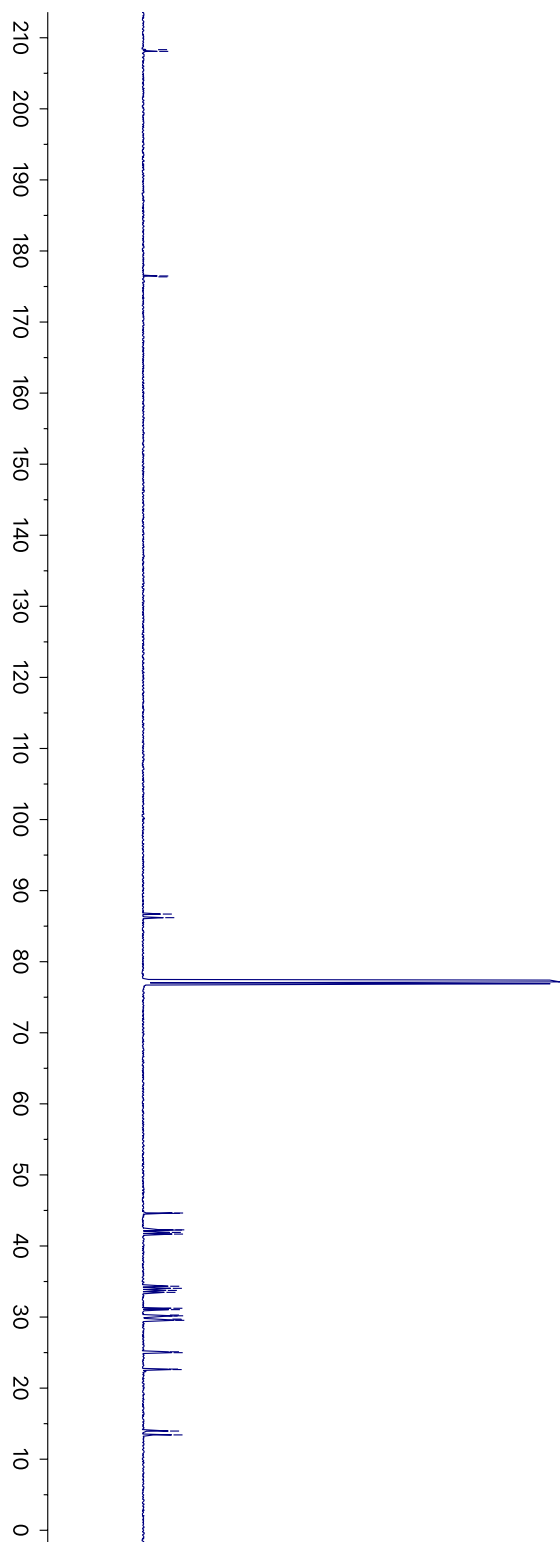

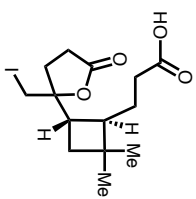

S2

mixture of diastereomers

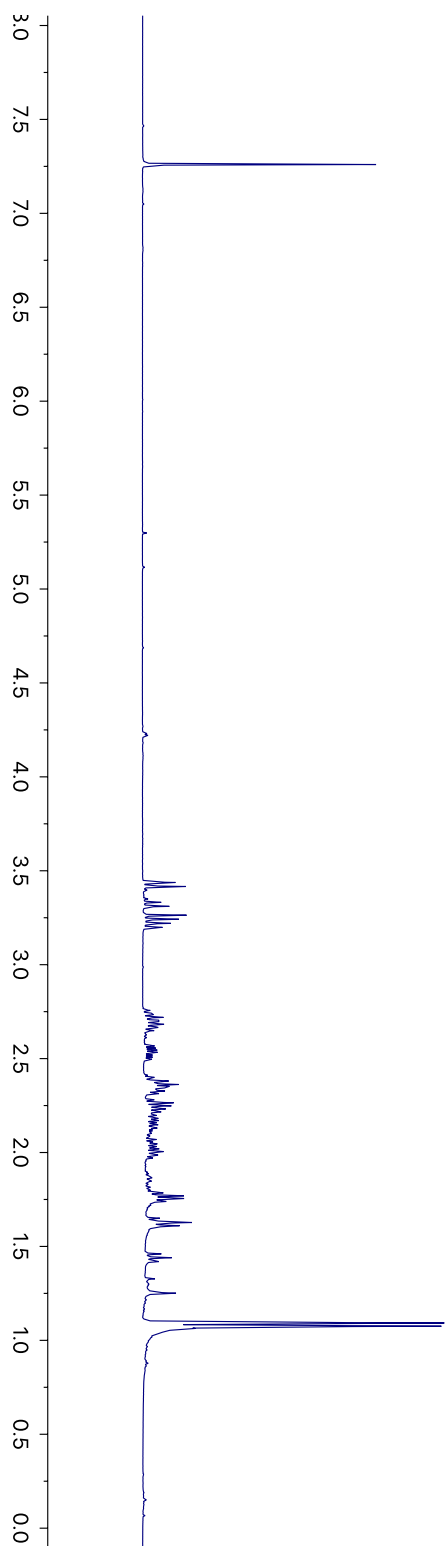

S23

178.245  
178.052  
176.491  
176.419

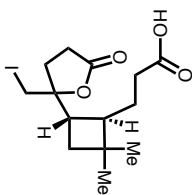

86.758  
86.200

44.450  
44.341  
42.187  
42.021  
34.292  
34.059  
33.783  
33.473  
32.305  
32.165  
31.143  
31.035  
30.187  
29.691  
29.670  
26.256  
26.221  
22.599  
22.550  
13.620  
13.288

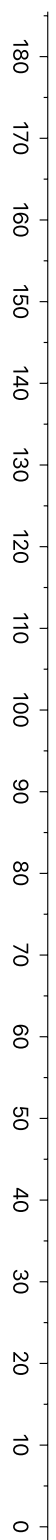



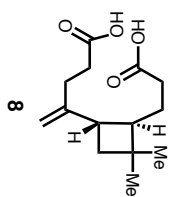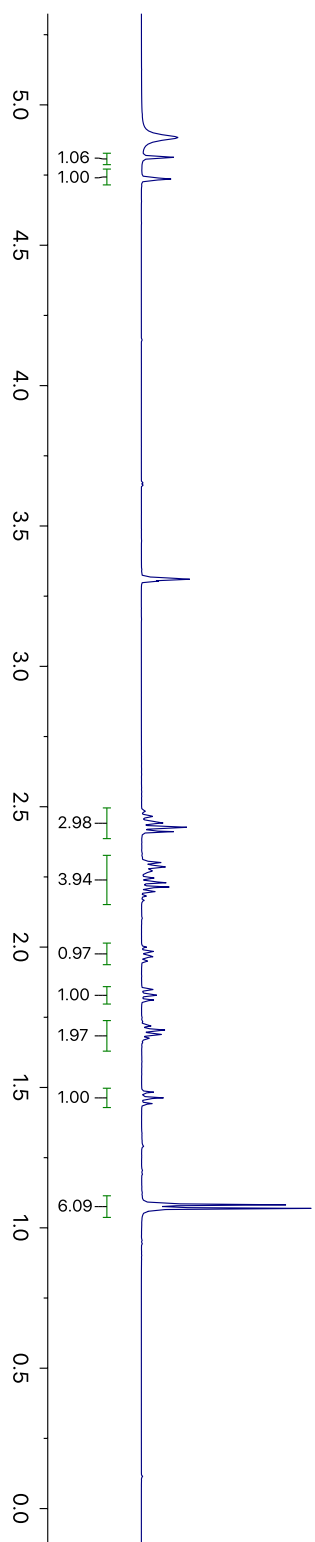

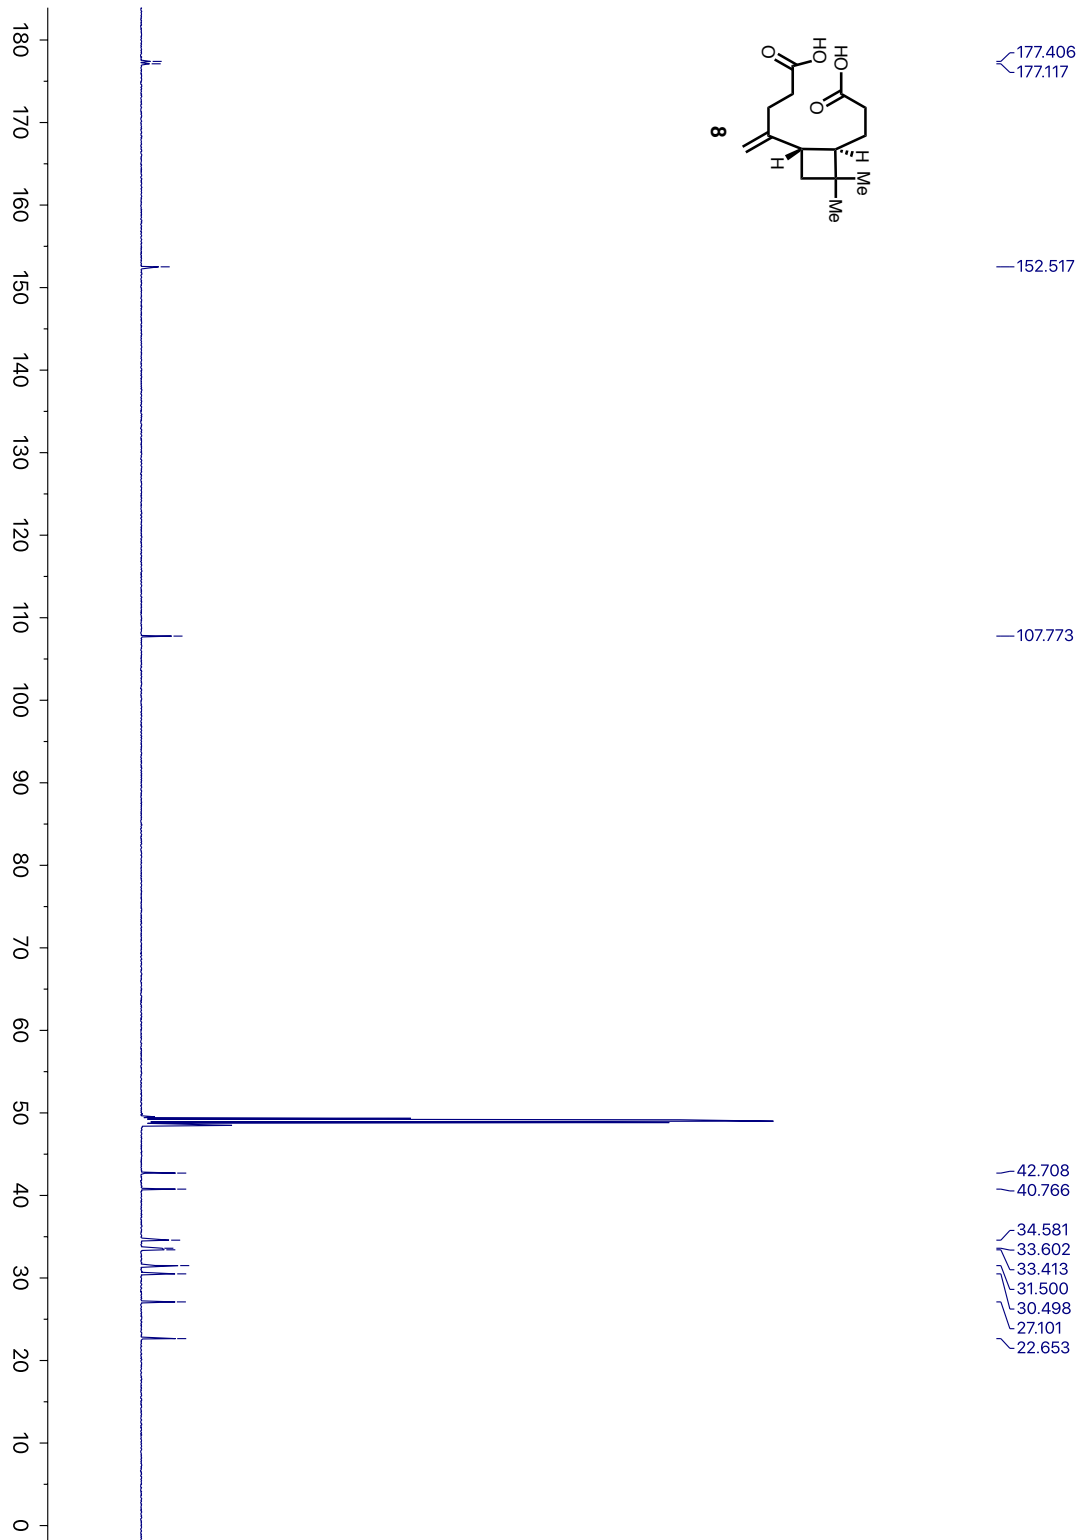

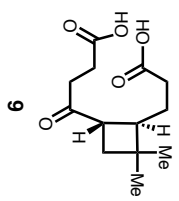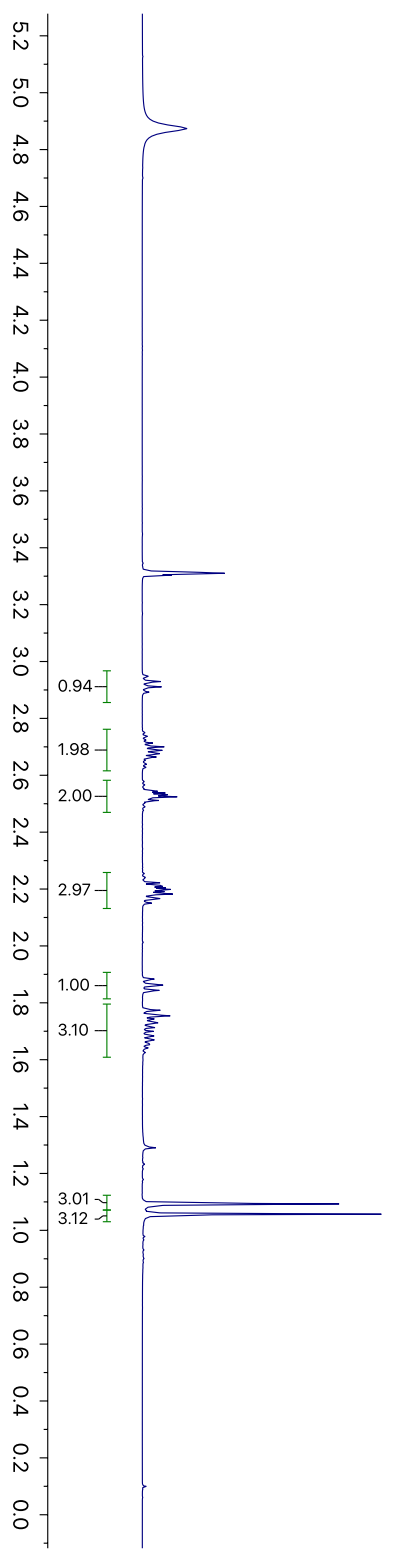

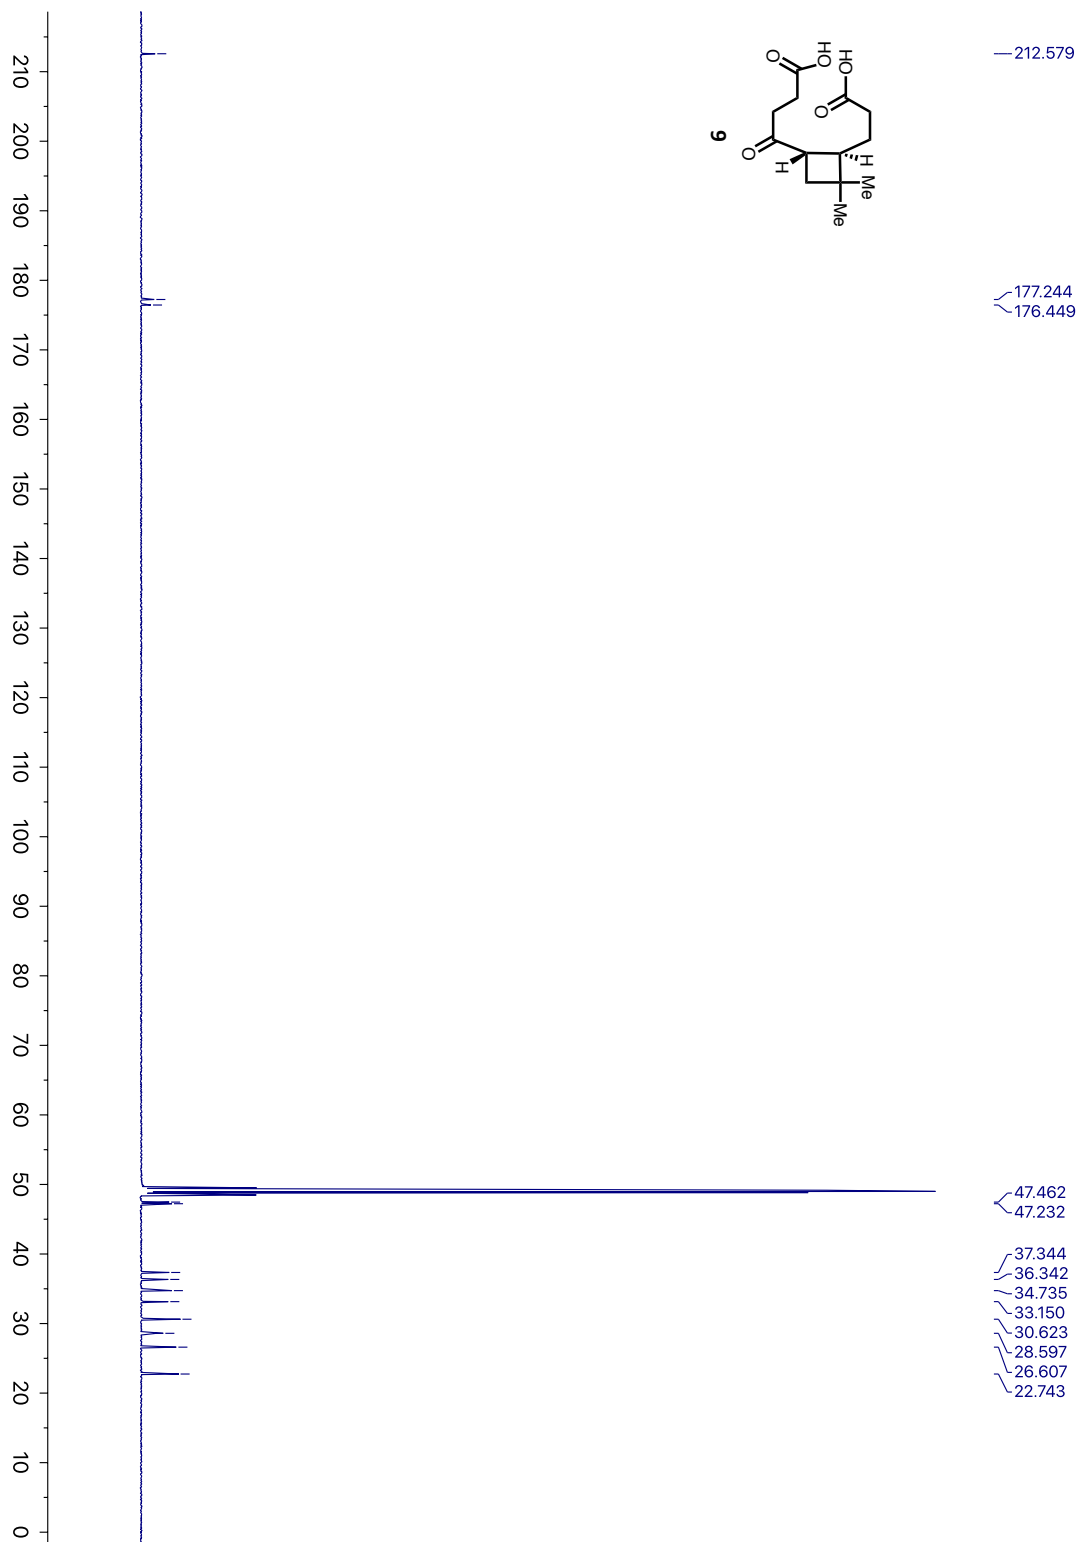

### 3.2 $^1\text{H}$ and $^{13}\text{C}$ NMR Spectra Revealing Aldehyde to Hydrate Conversion

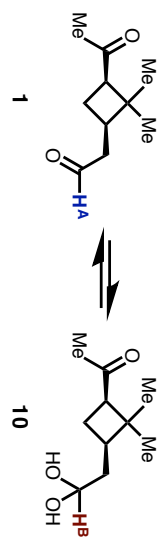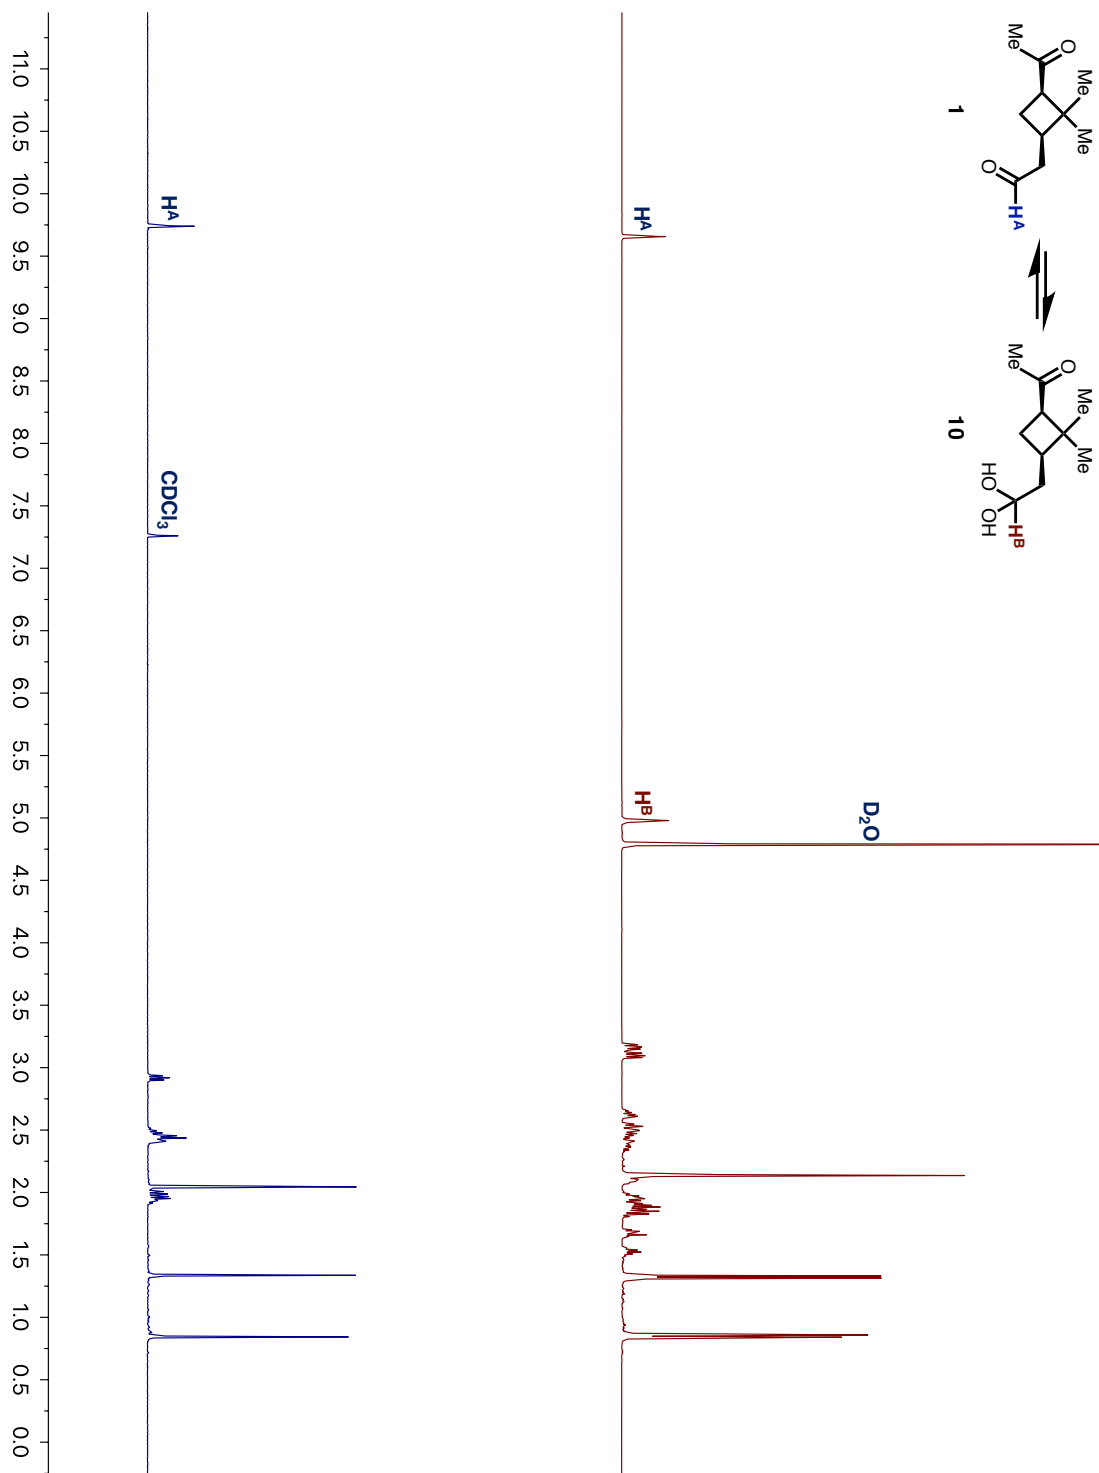

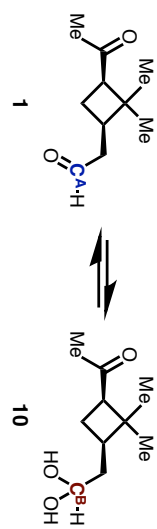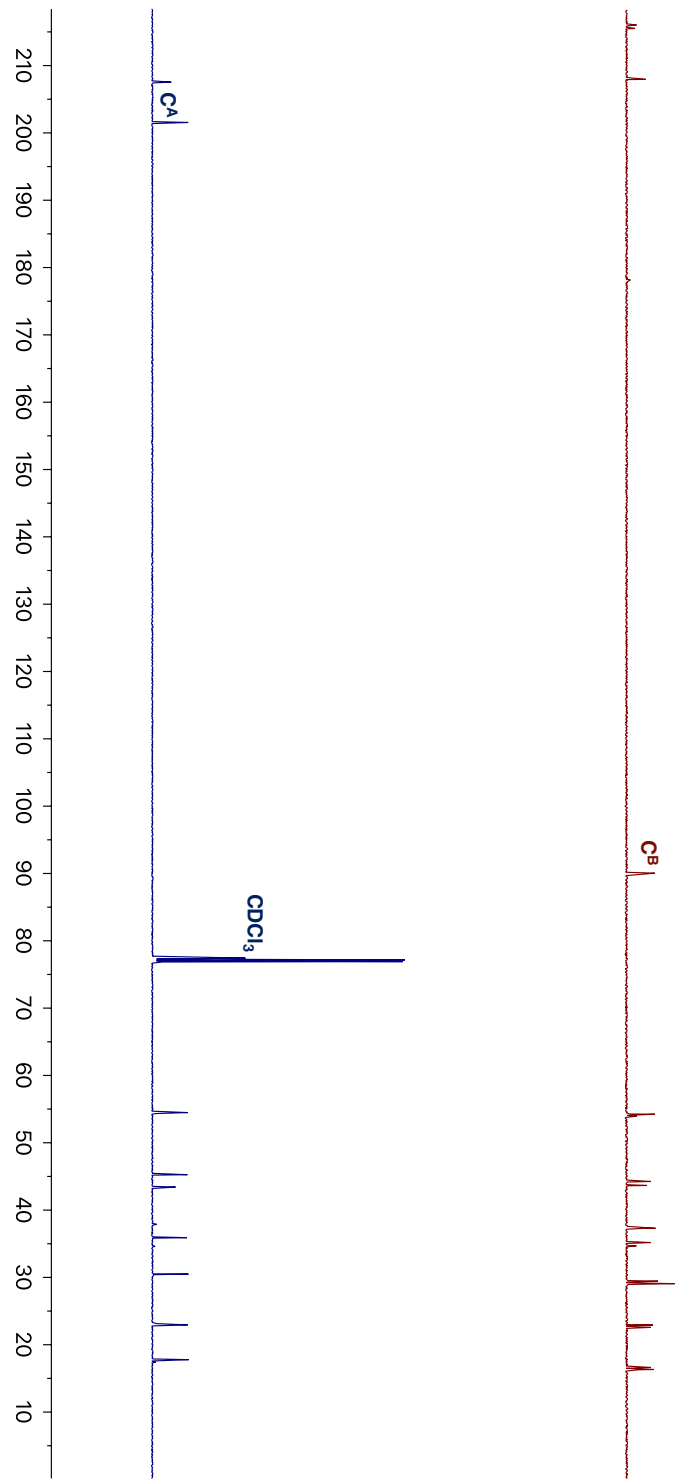

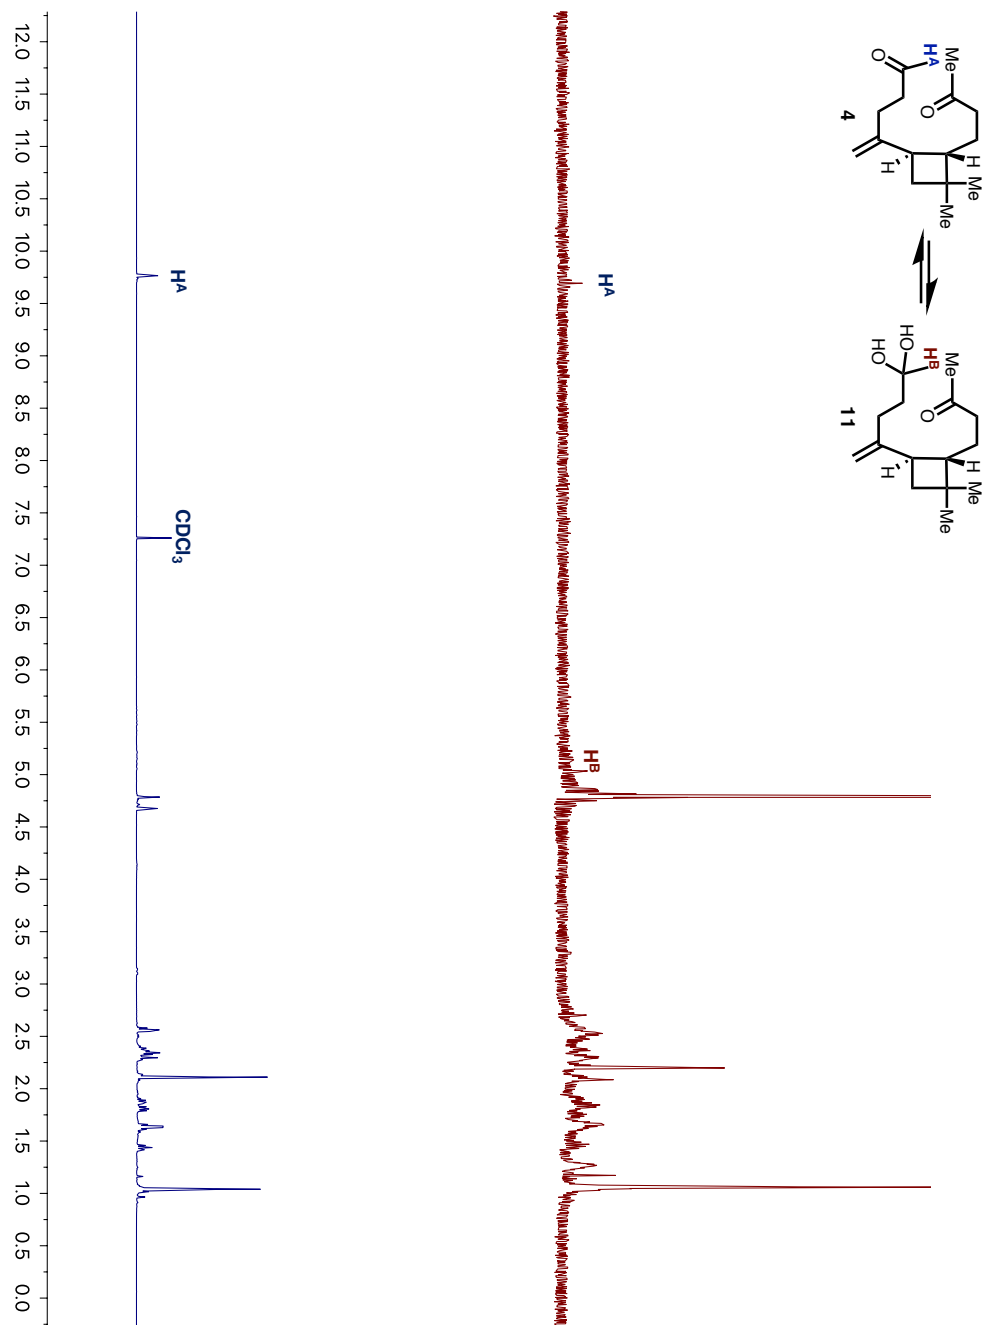

Note that the sparing solubility of  $\beta$ -caryophyllene aldehyde (**4**) in  $\text{D}_2\text{O}$  resulted in low signal-to-noise in the NMR spectra obtained for this compound and therefore the  $^{13}\text{C}$  NMR data is not included.

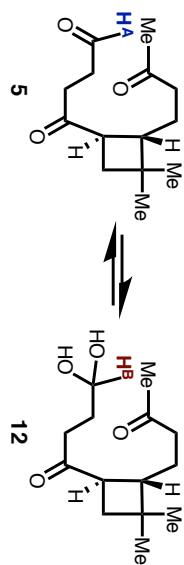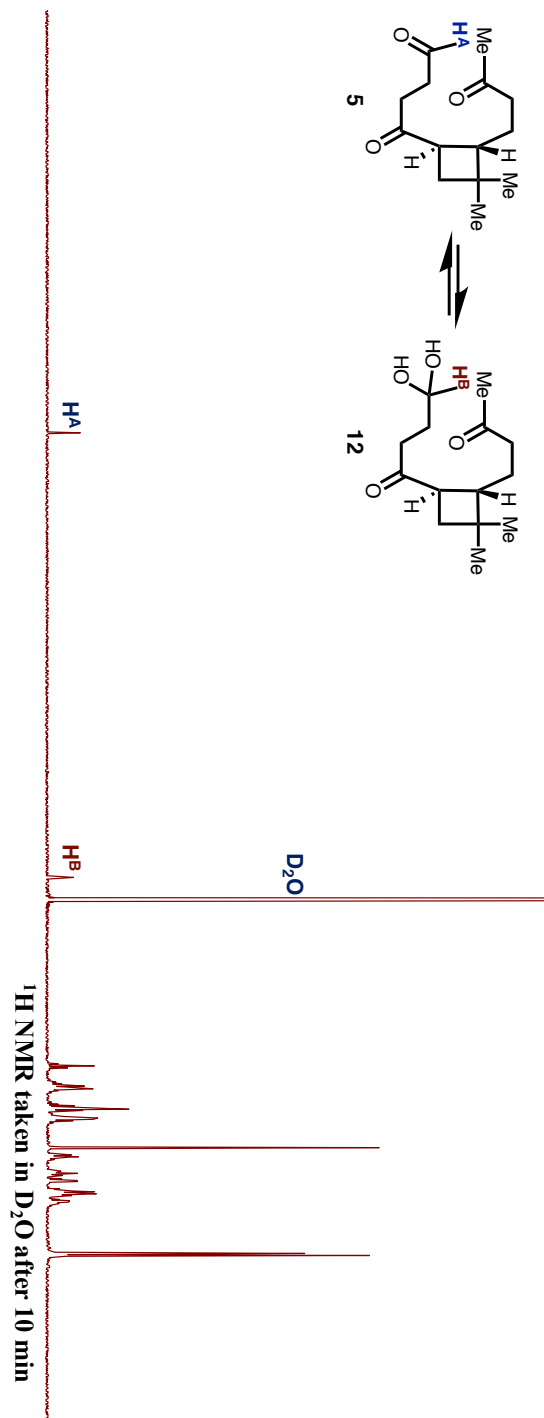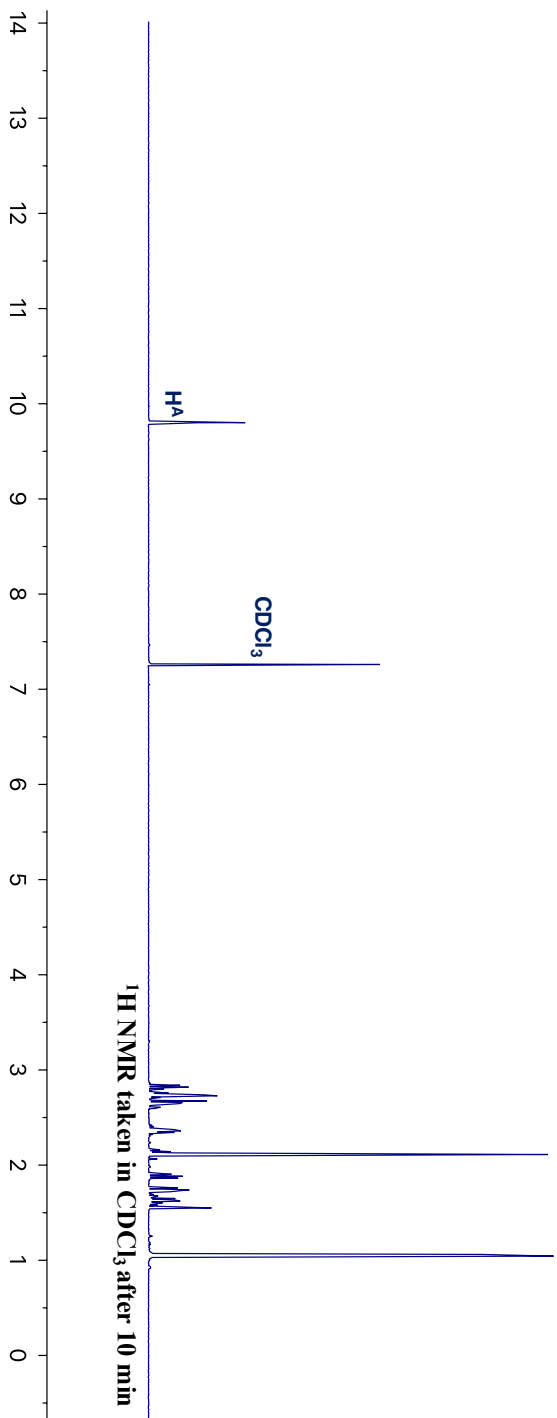



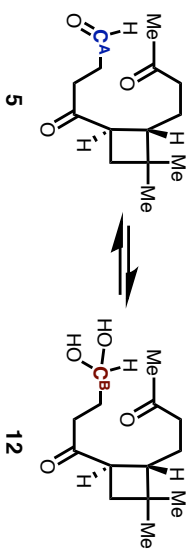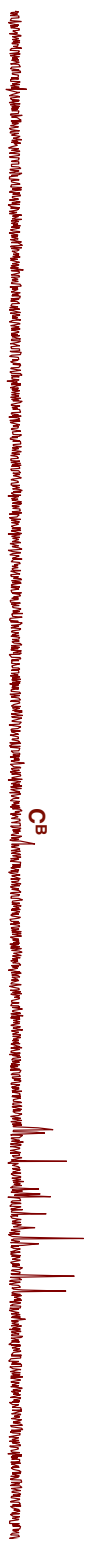

$^{13}\text{C}$  NMR taken in  $\text{D}_2\text{O}$  after 10 min

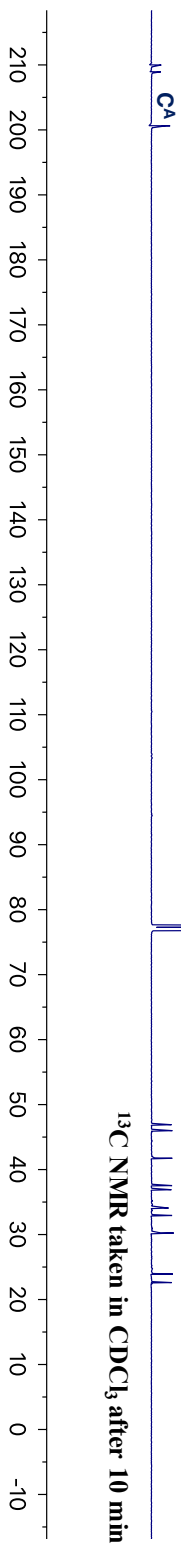

$^{13}\text{C}$  NMR taken in  $\text{CDCl}_3$  after 10 min

## 4. Dynamic Surface Tension Experimental Details and Supplementary Data

**4.1 Dynamic Surface Tension Experimental Details.** The procedure and experimental setup for interfacial tension measurements using PDT have been described in detail previously.<sup>3</sup> Briefly, surface tension was measured on a FTA125 goniometer by capturing images of droplets over the course of ten minutes at  $20 \pm 2$  °C for solutions prepared in either deionized H<sub>2</sub>O or 1.0 M (NH<sub>4</sub>)<sub>2</sub>SO<sub>4</sub> solution. The pH of the (NH<sub>4</sub>)<sub>2</sub>SO<sub>4</sub> solutions were approximately 5.0–6.0 and the pH of solutions prepared in water were approximately 6.0–7.5. Measurements are reported as an average of 3–5 successive runs (replicates). Interfacial tension measurements reported previously from our labs were performed using a 1 mL plastic syringe.<sup>3</sup> Due to the increased hydrophobicity of compounds measured here relative to those studied previously,<sup>3</sup> a consistent reduction in surface tension was noticed when comparing successive data acquisitions on the same solution collected using a plastic syringe without refreshing the solution volume in the syringe between runs (Figure S2). Potentially due to the solute molecules partitioning to the interior walls of the plastic syringe over time, this “dipping effect” was first noticed for oxidation products derived from  $\beta$ -caryophyllene and was especially pronounced for the more hydrophobic compounds that exhibit lower solubility in water and 1.0 M (NH<sub>4</sub>)<sub>2</sub>SO<sub>4</sub>. This “dipping effect” was not observed in our previous study,<sup>3</sup> likely due to the highly hydrophilic nature of the isoprene-derived oxidation products compared to the compounds analysed in this study. Use of a clean and oven-dried 1 mL glass syringe eliminated the “dipping effect” for all compounds studied here.

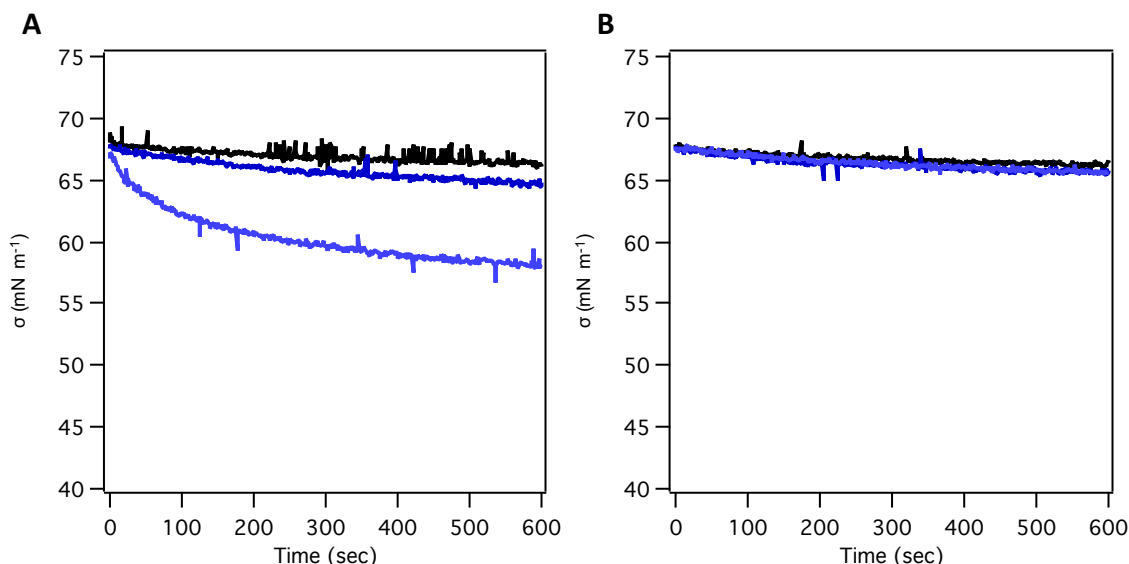

**Figure S2.** A) Example of “dipping effect” in surface tension data observed upon measuring a  $\beta$ -caryophyllene-derived oxidation product when volume in syringe was not refreshed and a plastic syringe was used. B) “Dipping effect” not observed when volume in syringe was refreshed each time using a plastic syringe and when volume in syringe was not refreshed using a glass syringe.

## 4.2 Dynamic Surface Tension Supplementary Data

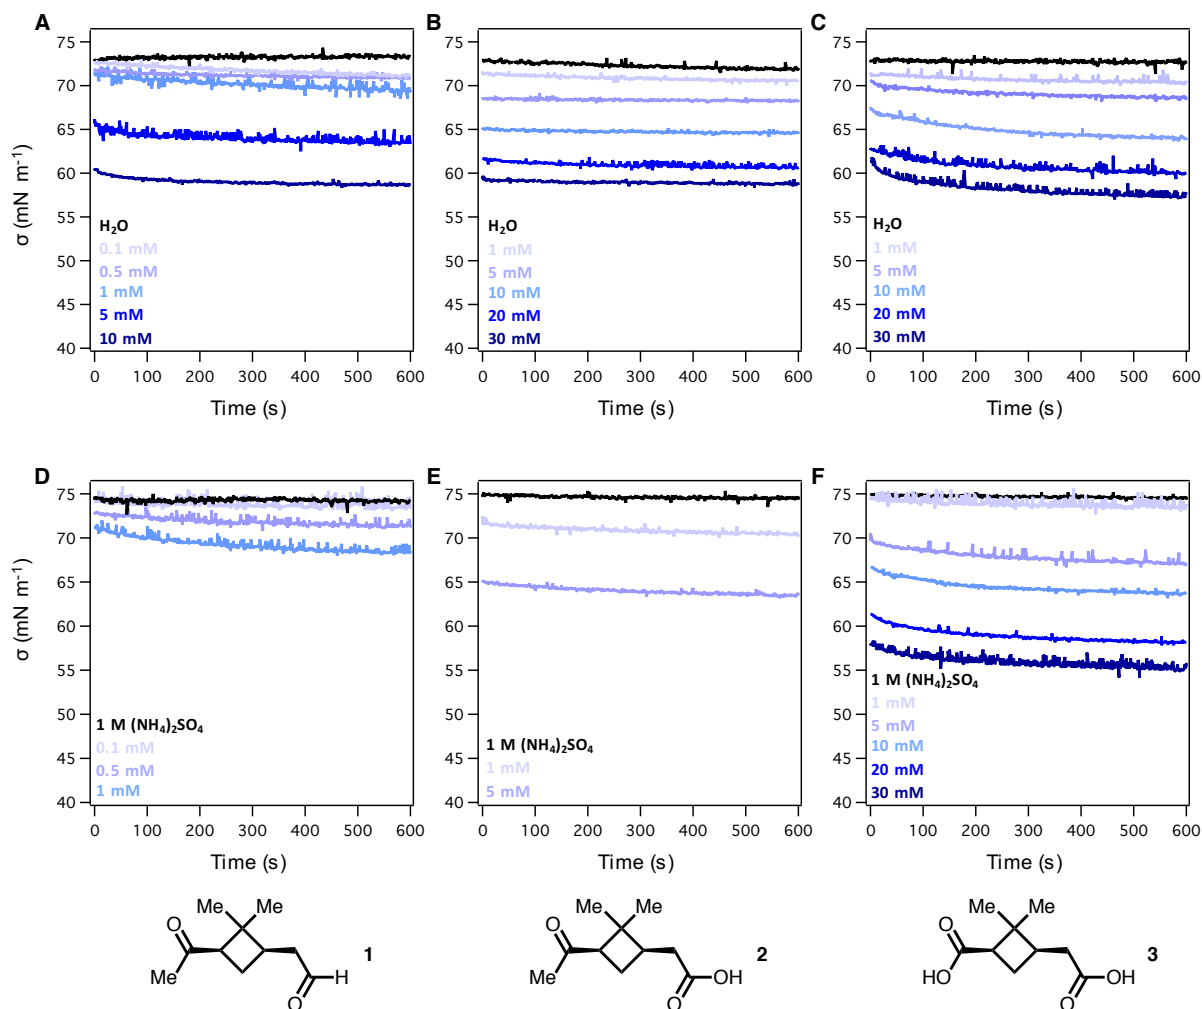

**Figure S3** Dynamic surface tension measurements for pinonaldehyde **1** (A, D), pinonic acid **2** (B, E), and pinic acid **3** (C, F) in water (**top**) and 1.0 M ammonium sulfate (**bottom**). Pinonaldehyde **1** (A) was insoluble at concentrations greater than 10 mM in *d*H<sub>2</sub>O. Pinonaldehyde **1** (D) and pinonic acid **2** (E) were insoluble at concentrations greater than 1 mM and 5 mM in 1.0 M ammonium sulfate, respectively.

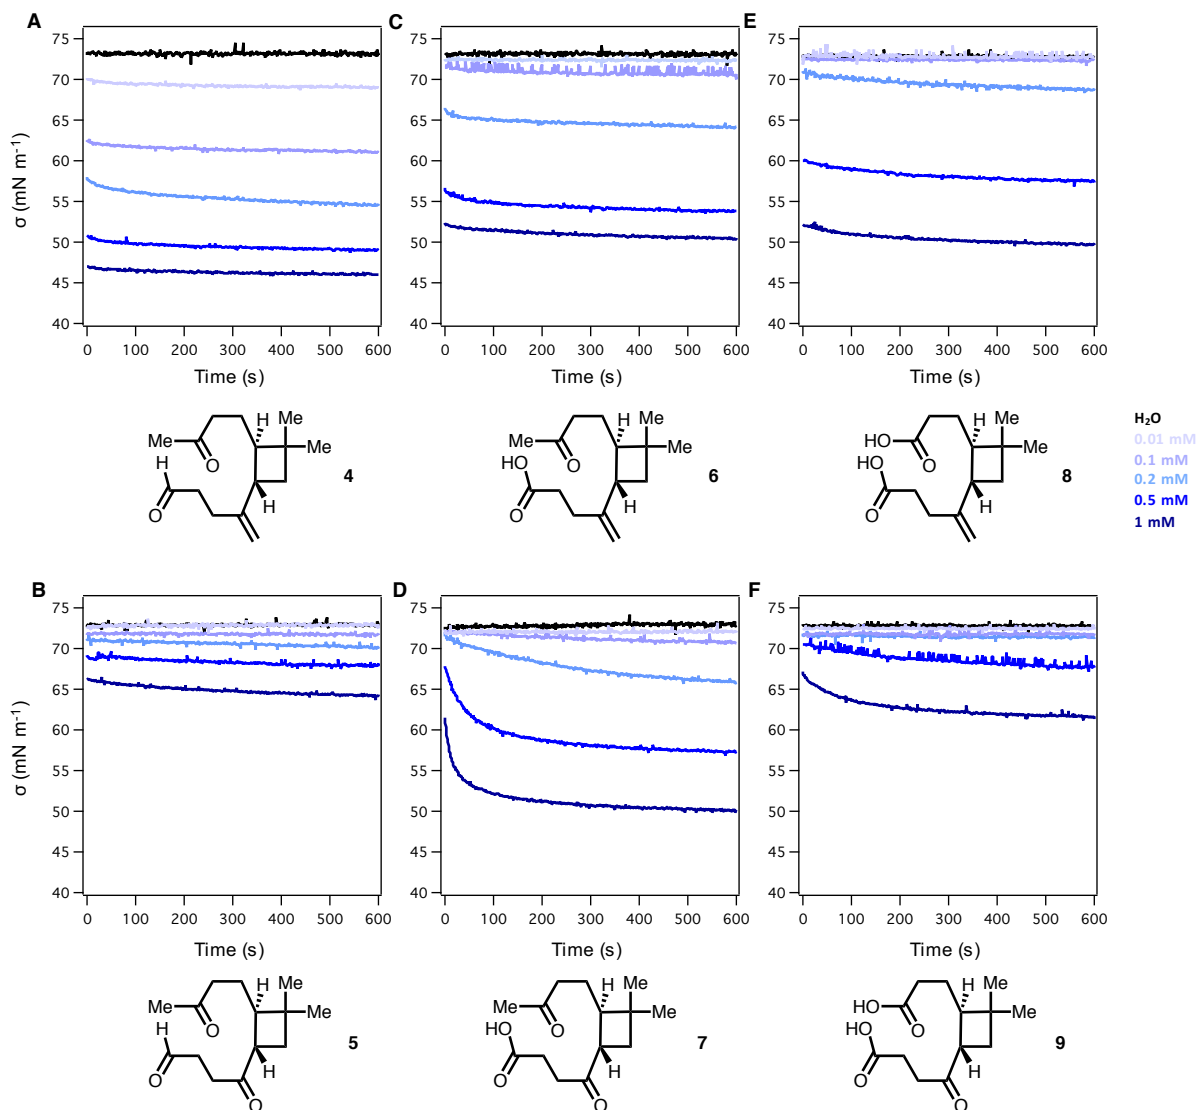

**Figure S4.** Dynamic surface tension measurements for  $\beta$ -caryophyllene aldehyde **4** (A),  $\beta$ -nocaryophyllone aldehyde **5** (B),  $\beta$ -caryophyllonic acid **6** (C),  $\beta$ -nocaryophyllonic acid **7** (D),  $\beta$ -caryophyllinic acid **8** (E), and  $\beta$ -nocaryophyllinic acid **9** (F) in water.

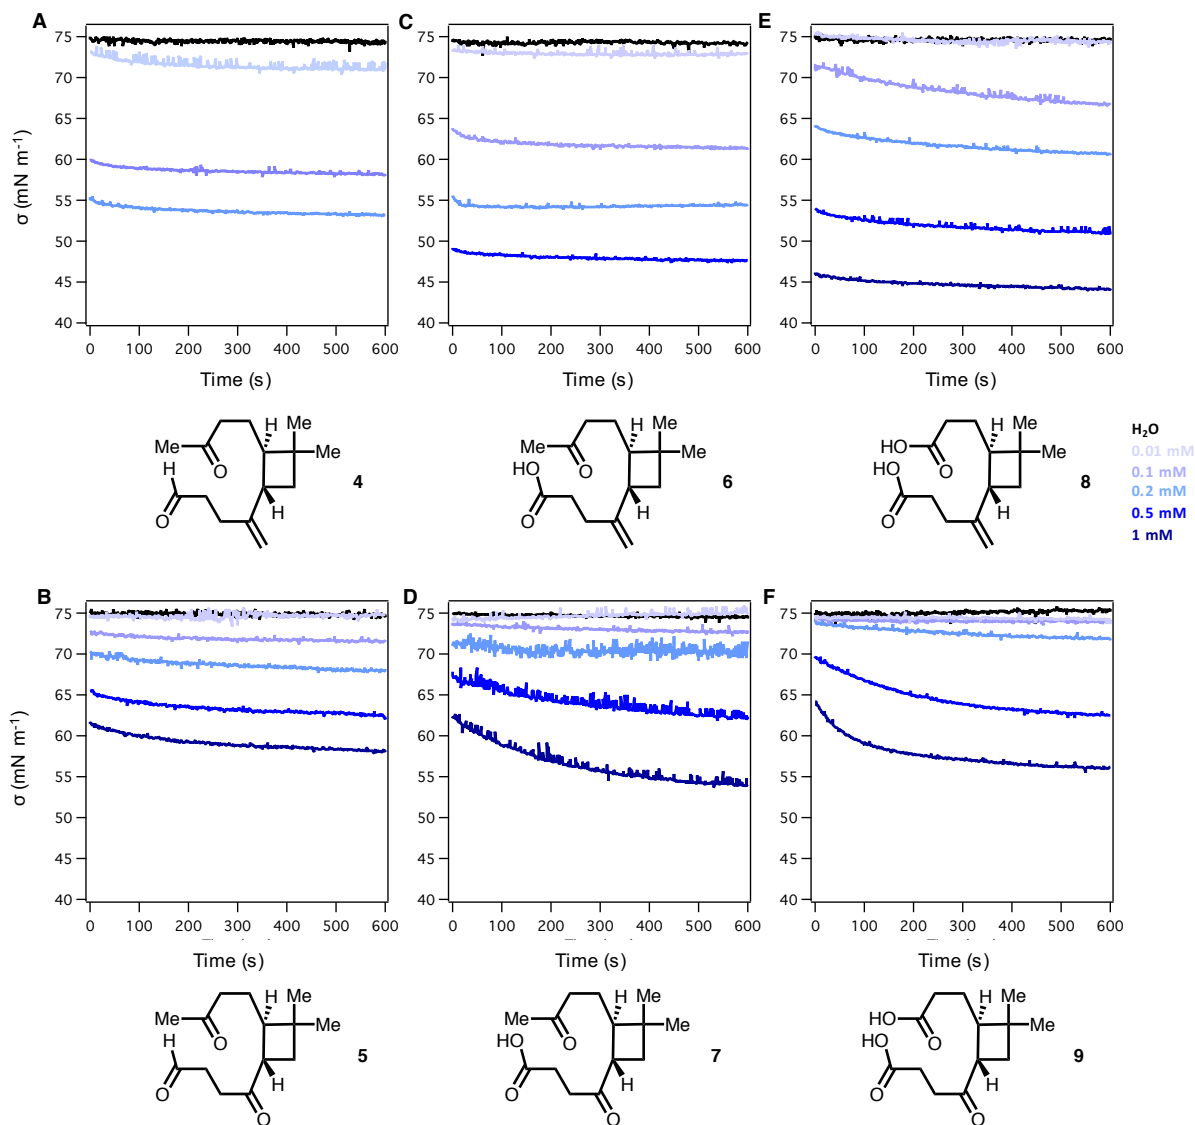

**Figure S5.** Dynamic surface tension measurements for  $\beta$ -caryophyllene aldehyde **4** (A),  $\beta$ -nocaryophyllone aldehyde **5** (B),  $\beta$ -caryophyllonic acid **6** (C),  $\beta$ -nocaryophyllonic acid **7** (D),  $\beta$ -caryophyllinic acid **8** (E), and  $\beta$ -nocaryophyllinic acid **9** (F) in 1.0 M ammonium sulfate.  $\beta$ -Caryophyllene aldehyde **4** (A) and  $\beta$ -caryophyllonic acid **6** (C) were insoluble at concentrations above 0.2 mM and 0.5 mM, respectively.

**Table S1.** Optimized fitting parameters for kinetics of interfacial tension and equilibration timescale calculations.

| compound                                                                                                          | conc. (mM) | n                     | $\sigma_{\text{in}}$ (mN m <sup>-1</sup> ) | $\sigma_{\text{out}}$ (mN m <sup>-1</sup> ) | $t_{\text{in,lab}}$ (s) | $D_{\text{drop}}$ (mm) | $t_{\text{eq,1}}$ $\mu\text{s}$ (s)            |
|-------------------------------------------------------------------------------------------------------------------|------------|-----------------------|--------------------------------------------|---------------------------------------------|-------------------------|------------------------|------------------------------------------------|
| 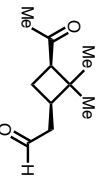<br>pinonaldehyde 1            | 0.1        | 1.06±0.25 (0.75±1.69) | 72.63±0.07 (74.30±0.46)                    | 68.94±1.91 (73.32±1.86)                     | 841±716 (n.d. *)        | 2.21±0.03 (2.18±0.04)  | 3.20x10 <sup>-4</sup> (n.d. *)                 |
|                                                                                                                   | 0.5        | 1.00±0.34 (0.98±0.46) | 71.77±0.08 (72.83±0.17)                    | 70.54±0.32 (70.45±1.22)                     | 257±123 (395±382)       | 2.29±0.01 (2.15±0.02)  | 1.03x10 <sup>-4</sup> (1.71x10 <sup>-4</sup> ) |
|                                                                                                                   | 1          | 0.82±0.55 (0.98±0.24) | 71.30±0.25 (71.21±0.20)                    | 64.68±12.55 (67.10±0.81)                    | n.d. * (269±99)         | 2.24±0.02 (2.14±0.06)  | n.d. * (1.18x10 <sup>-4</sup> )                |
|                                                                                                                   | 5          | n.d. *                | 66.05±1.53                                 | 60.09±12.96                                 | n.d. *                  | 2.21±0.02              | n.d. *                                         |
|                                                                                                                   | 10         | 0.49±0.14             | 60.87±0.32                                 | 57.75±0.46                                  | 101±34                  | 2.13±0.02              | 4.42x10 <sup>-5</sup>                          |
| <br>pinonic acid 2              | 1          | 1.05±0.34 (0.78±0.33) | 71.40±0.06 (71.65±0.12)                    | 69.94±0.59 (68.53±2.75)                     | 453±324 (n.d. *)        | 2.27±0.02 (2.04±0.09)  | 1.99x10 <sup>-4</sup> (5.05x10 <sup>-4</sup> ) |
|                                                                                                                   | 5          | 1.20±0.93 (0.86±0.19) | 68.55±0.05 (65.04±0.08)                    | 68.15±0.30 (62.08±0.89)                     | n.d. * (538±344)        | 2.23±0.04 (2.04±0.08)  | n.d. * (2.59x10 <sup>-4</sup> )                |
|                                                                                                                   | 10         | 0.82±0.52             | 65.09±0.09                                 | 64.26±0.58                                  | n.d. *                  | 2.19±0.04              | n.d. *                                         |
|                                                                                                                   | 20         | 0.65±0.53             | 61.71±0.27                                 | 60.02±1.34                                  | n.d. *                  | 2.16±0.04              | n.d. *                                         |
|                                                                                                                   | 30         | 0.61±0.46             | 59.39±0.14                                 | 58.28±0.96                                  | n.d. *                  | 2.13±0.07              | n.d. *                                         |
| <br>pinic acid 3                 | 1          | 1.81±0.53 (1.65±1.06) | 71.28±0.07 (74.49±0.15)                    | 70.32±0.13 (73.43±0.37)                     | 200±32 (222±96)         | 2.26±0.02 (2.19±0.07)  | 7.85x10 <sup>-5</sup> (9.25x10 <sup>-5</sup> ) |
|                                                                                                                   | 5          | 0.59±0.20 (0.79±0.22) | 70.50±0.20 (69.76±0.22)                    | 66.75±1.54 (65.27±1.35)                     | n.d. * (386±264)        | 2.22±0.02 (2.13±0.14)  | n.d. * (1.70x10 <sup>-4</sup> )                |
|                                                                                                                   | 10         | 1.27±0.10 (1.00±0.09) | 67.04±0.07 (66.62±0.09)                    | 63.28±0.16 (62.98±0.17)                     | 192±12 (156±13)         | 2.11±0.05 (2.10±0.03)  | 8.61x10 <sup>-5</sup> (7.10x10 <sup>-5</sup> ) |
|                                                                                                                   | 20         | 0.98±0.23 (0.67±0.08) | 62.87±0.21 (61.57±0.16)                    | 59.16±0.54 (56.44±0.47)                     | 194±12 (211±46)         | 2.04±0.05 (2.04±0.02)  | 8.95x10 <sup>-5</sup> (1.01x10 <sup>-4</sup> ) |
|                                                                                                                   | 30         | 0.44±0.20 (0.55±0.36) | 62.13±0.90 (58.32±0.69)                    | 53.41±3.71 (52.72±3.93)                     | n.d. * (n.d. *)         | 2.08±0.04 (1.94±0.08)  | n.d. * (n.d. *)                                |
| <br>β-carophyllene aldehyde 4    | 0.01       | 0.56±0.23 (1.24±0.35) | 70.16±0.21 (73.12±0.21)                    | 68.46±0.47 (70.87±0.21)                     | 173±122 (105±20)        | 2.25±0.04 (2.10±0.04)  | 6.84x10 <sup>-5</sup> (4.75x10 <sup>-5</sup> ) |
|                                                                                                                   | 0.1        | 0.59±0.20 (0.51±0.19) | 62.44±0.15 (60.12±0.30)                    | 60.02±0.88 (57.06±0.86)                     | n.d. * (231±190)        | 2.18±0.08 (2.03±0.01)  | n.d. * (1.13x10 <sup>-4</sup> )                |
|                                                                                                                   | 0.2        | 0.47±0.09 (0.51±0.13) | 57.98±0.21 (55.40±0.22)                    | 48.55±3.57 (51.55±0.91)                     | n.d. * (353±265)        | 2.08±0.11 (1.95±0.03)  | n.d. * (1.86x10 <sup>-4</sup> )                |
|                                                                                                                   | 0.5        | 0.47±0.15             | 50.93±0.22                                 | 46.83±1.72                                  | n.d. *                  | 1.99±0.14              | n.d. *                                         |
|                                                                                                                   | 1          | 0.65±0.22             | 47.03±0.11                                 | 45.24±0.66                                  | 425±423                 | 1.95±0.01              | 2.24x10 <sup>-4</sup>                          |
| <br>β-nocaryophyllone aldehyde 5 | 0.01       | n.d. * (n.d. *)       | 72.55±1.44 (74.50±0.07)                    | 73.21±4.64 (74.97±1.44)                     | n.d. * (n.d. *)         | 2.23±0.05 (2.17±0.10)  | n.d. * (n.d. *)                                |
|                                                                                                                   | 0.1        | n.d. * (0.75±0.27)    | 71.86±0.06 (72.71±0.14)                    | 71.61±0.69 (71.02±0.46)                     | n.d. * (232±142)        | 2.17±0.07 (2.15±0.05)  | n.d. * (1.00x10 <sup>-4</sup> )                |
|                                                                                                                   | 0.2        | 1.22±0.47 (0.73±0.22) | 71.01±0.05 (70.17±0.16)                    | 68.45±3.04 (64.72±3.13)                     | n.d. * (n.d. *)         | 2.18±0.05 (2.07±0.04)  | n.d. * (n.d. *)                                |
|                                                                                                                   | 0.5        | 1.83±0.37 (0.70±0.11) | 68.94±0.04 (65.56±0.15)                    | 67.62±0.18 (60.53±0.75)                     | 293±47 (349±130)        | 2.14±0.02 (2.03±0.02)  | 1.27x10 <sup>-4</sup> (1.69x10 <sup>-4</sup> ) |
|                                                                                                                   | 1          | 0.88±0.12 (0.90±0.08) | 66.21±0.07 (61.52±0.09)                    | 62.52±0.64 (56.76±0.30)                     | 488±177 (229±28)        | 2.14±0.02 (2.03±0.03)  | 2.12x10 <sup>-4</sup> (1.12x10 <sup>-4</sup> ) |

\* = due to large uncertainties on the point estimates

**Table S1 (continued).** Optimized fitting parameters for kinetics of interfacial tension and equilibration timescale calculations.

| compound                                                                                                                                | conc. (mM) | n                                 | $\Gamma_m$ (mN m <sup>-1</sup> )    | $\Gamma_m$ (mN m <sup>-1</sup> )    | $t_{m,lab}$ (s)               | $D_{diff}$ (mm)                   | $t_{eq,1}$ $\mu$ m (s)                                           |
|-----------------------------------------------------------------------------------------------------------------------------------------|------------|-----------------------------------|-------------------------------------|-------------------------------------|-------------------------------|-----------------------------------|------------------------------------------------------------------|
| <br><b><math>\beta</math>-carxyophyllonic acid 6</b> | 0.01       | n.d.* (1.80 $\pm$ 0.91)           | 72.45 $\pm$ 0.05 (73.32 $\pm$ 0.10) | 72.18 $\pm$ 1.11 (72.82 $\pm$ 0.05) | n.d.* (83 $\pm$ 25)           | 2.17 $\pm$ 0.05 (2.13 $\pm$ 0.07) | n.d.* (3.65 $\times$ 10 <sup>-5</sup> )                          |
|                                                                                                                                         | 0.1        | 1.99 $\pm$ 1.13 (0.50 $\pm$ 0.13) | 71.49 $\pm$ 0.14 (64.18 $\pm$ 0.42) | 70.74 $\pm$ 0.10 (60.39 $\pm$ 0.48) | 114 $\pm$ 32 (77 $\pm$ 21)    | 2.25 $\pm$ 0.01 (2.02 $\pm$ 0.05) | 4.80 $\times$ 10 <sup>-5</sup> (3.75 $\times$ 10 <sup>-5</sup> ) |
|                                                                                                                                         | 0.2        | 0.44 $\pm$ 0.20 (n.d.*)           | 66.21 $\pm$ 0.29 (54.51 $\pm$ 1.96) | 60.44 $\pm$ 4.90 (54.11 $\pm$ 2.96) | n.d.* (n.d.*)                 | 2.18 $\pm$ 0.03 (1.97 $\pm$ 0.05) | n.d.* (n.d.*)                                                    |
|                                                                                                                                         | 0.5        | 0.51 $\pm$ 0.11 (0.55 $\pm$ 0.20) | 56.62 $\pm$ 0.25 (49.09 $\pm$ 0.18) | 51.93 $\pm$ 0.85 (46.04 $\pm$ 1.39) | 272 $\pm$ 148 (n.d.*)         | 2.01 $\pm$ 0.03 (1.87 $\pm$ 0.03) | 1.34 $\times$ 10 <sup>-4</sup> (n.d.*)                           |
|                                                                                                                                         | 1          | 0.71 $\pm$ 0.15                   | 52.14 $\pm$ 0.09                    | 48.43 $\pm$ 1.20                    | 774 $\pm$ 623                 | 1.97 $\pm$ 0.02                   | 3.97 $\times$ 10 <sup>-4</sup>                                   |
| <br><b><math>\beta</math>-nocaryophyllonic acid 7</b>  | 0.01       | n.d.* (1.23 $\pm$ 0.70)           | 71.96 $\pm$ 0.24 (74.21 $\pm$ 0.09) | 72.23 $\pm$ 2.03 (n.d.*)            | n.d.* (n.d.*)                 | 2.21 $\pm$ 0.05 (2.14 $\pm$ 0.10) | n.d.* (n.d.*)                                                    |
|                                                                                                                                         | 0.1        | 1.08 $\pm$ 0.28 (0.93 $\pm$ 0.37) | 72.11 $\pm$ 0.08 (73.68 $\pm$ 0.09) | 69.82 $\pm$ 0.72 (71.55 $\pm$ 1.40) | 441 $\pm$ 241 (n.d.*)         | 2.25 $\pm$ 0.06 (2.08 $\pm$ 0.01) | 1.74 $\times$ 10 <sup>-4</sup> (n.d.*)                           |
|                                                                                                                                         | 0.2        | 1.07 $\pm$ 0.06 (2.00 $\pm$ 1.21) | 71.37 $\pm$ 0.07 (71.39 $\pm$ 0.26) | 63.09 $\pm$ 0.39 (70.33 $\pm$ 0.10) | 314 $\pm$ 26 (71 $\pm$ 26)    | 2.25 $\pm$ 0.01 (2.07 $\pm$ 0.05) | 1.29 $\times$ 10 <sup>-4</sup> (3.31 $\times$ 10 <sup>-5</sup> ) |
|                                                                                                                                         | 0.5        | 0.95 $\pm$ 0.02 (0.95 $\pm$ 0.23) | 68.12 $\pm$ 0.14 (67.30 $\pm$ 0.29) | 56.41 $\pm$ 0.06 (58.48 $\pm$ 2.56) | 45 $\pm$ 1 (460 $\pm$ 259)    | 2.09 $\pm$ 0.01 (2.02 $\pm$ 0.01) | 2.07 $\times$ 10 <sup>-5</sup> (2.26 $\times$ 10 <sup>-4</sup> ) |
|                                                                                                                                         | 1          | 0.64 $\pm$ 0.02 (1.17 $\pm$ 0.09) | 63.50 $\pm$ 0.38 (62.20 $\pm$ 0.19) | 48.89 $\pm$ 0.09 (51.60 $\pm$ 0.52) | 14 $\pm$ 1 (209 $\pm$ 16)     | 2.00 $\pm$ 0.03 (1.99 $\pm$ 0.01) | 7.21 $\times$ 10 <sup>-6</sup> (1.05 $\times$ 10 <sup>-4</sup> ) |
| <br><b><math>\beta</math>-carxyophyllonic acid 8</b>   | 0.01       | n.d.* (2.00 $\pm$ 0.65)           | 72.98 $\pm$ 0.09 (75.18 $\pm$ 0.09) | 72.75 $\pm$ 0.08 (74.35 $\pm$ 0.06) | 137 $\pm$ 86 (113 $\pm$ 18)   | 2.29 $\pm$ 0.01 (2.16 $\pm$ 0.02) | 5.22 $\times$ 10 <sup>-5</sup> (4.84 $\times$ 10 <sup>-5</sup> ) |
|                                                                                                                                         | 0.1        | n.d.* (0.99 $\pm$ 0.11)           | 72.46 $\pm$ 0.03 (71.49 $\pm$ 0.13) | n.d.* (63.09 $\pm$ 1.19)            | n.d.* (453 $\pm$ 120)         | 2.23 $\pm$ 0.05 (2.13 $\pm$ 0.06) | n.d.* (2.00 $\times$ 10 <sup>-4</sup> )                          |
|                                                                                                                                         | 0.2        | 0.84 $\pm$ 0.20 (0.68 $\pm$ 0.09) | 70.88 $\pm$ 0.13 (64.10 $\pm$ 0.12) | 66.70 $\pm$ 1.41 (56.18 $\pm$ 1.66) | 569 $\pm$ 413 (881 $\pm$ 479) | 2.20 $\pm$ 0.06 (2.08 $\pm$ 0.06) | 2.36 $\times$ 10 <sup>-4</sup> (4.08 $\times$ 10 <sup>-4</sup> ) |
|                                                                                                                                         | 0.5        | 0.94 $\pm$ 0.09 (0.68 $\pm$ 0.16) | 60.05 $\pm$ 0.07 (53.95 $\pm$ 0.20) | 56.40 $\pm$ 0.26 (48.47 $\pm$ 1.58) | 242 $\pm$ 32 (519 $\pm$ 391)  | 2.07 $\pm$ 0.03 (1.92 $\pm$ 0.05) | 1.12 $\times$ 10 <sup>-4</sup> (2.81 $\times$ 10 <sup>-4</sup> ) |
|                                                                                                                                         | 1          | 0.78 $\pm$ 0.10 (0.60 $\pm$ 0.14) | 52.29 $\pm$ 0.10 (46.10 $\pm$ 0.13) | 48.44 $\pm$ 0.37 (41.36 $\pm$ 1.91) | 249 $\pm$ 52 (n.d.*)          | 1.99 $\pm$ 0.04 (1.84 $\pm$ 0.20) | 1.26 $\times$ 10 <sup>-4</sup> (n.d.*)                           |
| <br><b><math>\beta</math>-nocaryophyllonic acid 9</b>  | 0.01       | n.d.* (n.d.*)                     | 72.49 $\pm$ 0.03 (74.47 $\pm$ 0.03) | 72.34 $\pm$ 3.31 (73.28 $\pm$ 9.14) | n.d.* (n.d.*)                 | 2.21 $\pm$ 0.01 (2.15 $\pm$ 0.02) | n.d.* (n.d.*)                                                    |
|                                                                                                                                         | 0.1        | n.d.* (0.95 $\pm$ 0.91)           | 71.77 $\pm$ 0.84 (74.30 $\pm$ 0.15) | 71.81 $\pm$ 2.16 (73.96 $\pm$ 0.10) | n.d.* (66 $\pm$ 55)           | 2.18 $\pm$ 0.02 (2.20 $\pm$ 0.03) | n.d.* (2.82 $\times$ 10 <sup>-5</sup> )                          |
|                                                                                                                                         | 0.2        | 2.00 $\pm$ 1.20 (0.99 $\pm$ 0.18) | 71.69 $\pm$ 0.05 (73.81 $\pm$ 0.08) | 71.37 $\pm$ 0.07 (70.05 $\pm$ 0.97) | 180 $\pm$ 51 (546 $\pm$ 259)  | 2.16 $\pm$ 0.01 (2.17 $\pm$ 0.01) | 7.73 $\times$ 10 <sup>-5</sup> (2.36 $\times$ 10 <sup>-4</sup> ) |
|                                                                                                                                         | 0.5        | 0.91 $\pm$ 0.27 (1.29 $\pm$ 0.04) | 70.62 $\pm$ 0.22 (69.41 $\pm$ 0.06) | 65.48 $\pm$ 1.85 (60.95 $\pm$ 0.13) | 456 $\pm$ 332 (185 $\pm$ 4)   | 2.10 $\pm$ 0.04 (2.11 $\pm$ 0.02) | 2.07 $\times$ 10 <sup>-4</sup> (8.33 $\times$ 10 <sup>-5</sup> ) |
|                                                                                                                                         | 1          | 0.93 $\pm$ 0.05 (0.89 $\pm$ 0.03) | 66.89 $\pm$ 0.12 (64.52 $\pm$ 0.12) | 60.72 $\pm$ 0.13 (54.64 $\pm$ 0.12) | 91 $\pm$ 4 (83 $\pm$ 2)       | 2.07 $\pm$ 0.02 (1.97 $\pm$ 0.03) | 4.21 $\times$ 10 <sup>-5</sup> (4.28 $\times$ 10 <sup>-5</sup> ) |

\* = due to large uncertainties on the point estimates

**Table S2. A)** Equilibrium surface tension for  $\alpha$ -pinene-derived oxidation products at 0–30 mM in H<sub>2</sub>O and 1.0 M (NH<sub>4</sub>)<sub>2</sub>SO<sub>4</sub> (values in parentheses). All values have units of mN m<sup>-1</sup>. [Asterisk (\*) notes that value was not obtained due to insolubility at the indicated concentration.] **B)** Fitting parameters, *a* and *b*, cross-sectional area of the surfactant molecules at the surface ( $\omega$ ), and free energy of adsorption ( $\Delta G_{ads}^{\circ}$ ) for the  $\alpha$ -pinene-derived oxidation products obtained from Szyszkowski-Langmuir equation,<sup>4-6</sup> where *T* is the laboratory temperature,  $\sigma_{blank}$  is the average surface tension of the blank solution, and  $\sigma$  is the minimum surface tension at each concentration *C* (in mM) measured. [SEP denotes standard error exceeds point estimate.]

| A                                                                                                                               |                                                                                   |                                                                                    |                                                                                     |
|---------------------------------------------------------------------------------------------------------------------------------|-----------------------------------------------------------------------------------|------------------------------------------------------------------------------------|-------------------------------------------------------------------------------------|
|                                                                                                                                 | 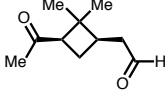 |  |  |
| Conc. (mM)                                                                                                                      | pinonaldehyde 1                                                                   | pinonic acid 2                                                                     | pinic acid 3                                                                        |
| 0                                                                                                                               | 73.29±0.15<br>(74.16±0.13)                                                        | 71.90±0.11<br>(74.52±0.09)                                                         | 72.66±0.28<br>(74.52±0.09)                                                          |
| 1                                                                                                                               | 69.40±0.33<br>(68.54±0.36)                                                        | 70.57±0.07<br>(70.42±0.12)                                                         | 70.31±0.08<br>(73.51±0.30)                                                          |
| 5                                                                                                                               | 63.61±0.31<br>(N/A*)                                                              | 68.27±0.10<br>(63.48±0.11)                                                         | 68.63±0.14<br>(67.16±0.28)                                                          |
| 10                                                                                                                              | 58.66±0.10<br>(N/A*)                                                              | 64.59±0.08<br>(N/A*)                                                               | 64.00±0.16<br>(63.71±0.11)                                                          |
| 20                                                                                                                              | N/A*<br>(N/A*)                                                                    | 60.68±0.17<br>(N/A*)                                                               | 60.02±0.12<br>(58.16±0.08)                                                          |
| 30                                                                                                                              | N/A*<br>(N/A*)                                                                    | 58.79±0.19<br>(N/A*)                                                               | 57.46±0.29<br>(55.21±0.28)                                                          |
| B                                                                                                                               |                                                                                   |                                                                                    |                                                                                     |
| Szyszkowski-Langmuir equation fit parameters: $\sigma = \sigma_{blank} - aT \ln(1 + bC)$ where $a = R/\omega$ and $b = K_{ads}$ |                                                                                   |                                                                                    |                                                                                     |
| <i>a</i><br>(mN m <sup>-1</sup> K <sup>-1</sup> )                                                                               | 0.026 ± 0.007<br>(0.067 ± SEP)                                                    | 0.024 ± 0.004<br>(0.022± N/A)                                                      | 0.030 ± 0.008<br>(0.034 ± 0.004)                                                    |
| <i>b</i><br>(L mmol <sup>-1</sup> )                                                                                             | 0.53 ± 0.30<br>(0.36 ± SEP)                                                       | 0.21 ± 0.08<br>(0.89 ± N/A)                                                        | 0.16 ± 0.08<br>(0.21 ± 0.05)                                                        |
| $\omega$<br>(Å <sup>2</sup> molec <sup>-1</sup> )                                                                               | 54.0 ± 15.5<br>(20.7 ± SEP)                                                       | 57.2 ± 10.7<br>(61.8 ± N/A)                                                        | 45.7 ± 12.4<br>(40.8 ± 4.7)                                                         |
| $-\Delta G_{ads}^{\circ}$<br>(kJ mol <sup>-1</sup> )                                                                            | 25.1 ± 1.4<br>(24.1 ± SEP)                                                        | 22.9 ± 0.9<br>(26.3 ± N/A)                                                         | 22.1 ± 1.2<br>(22.8 ± 0.6)                                                          |



**Table S3.** A) Equilibrium surface tension for  $\beta$ -caryophyllene-derived oxidation products at 0–1 mM in H<sub>2</sub>O and 1.0 M (NH<sub>4</sub>)<sub>2</sub>SO<sub>4</sub> (values in parentheses). All values have units of mN m<sup>-1</sup>. [Asterisk (\*) notes that value was not obtained due to insolubility at the indicated concentration.] B) Fitting parameters,  $a$  and  $b$ , cross-sectional area of the surfactant molecules at the surface ( $\omega$ ), and free energy of adsorption ( $\Delta G_{ads}^{\circ}$ ) for the  $\beta$ -caryophyllene-derived oxidation products obtained from Szyszkowski-Langmuir equation,<sup>4,6</sup> where  $T$  is the laboratory temperature,  $\sigma_{blank}$  is the average surface tension of the blank solution, and  $\sigma$  is the minimum surface tension at each concentration  $C$  (in mM) measured. [SEP denotes standard error exceeds point estimate.]

| Conc. (mM) | $\beta$ -caryophyllene aldehyde 4 | $\beta$ -nocaryophyllone aldehyde 5 | $\beta$ -caryophyllonic acid 6 | $\beta$ -nocaryophyllonic acid 7 | $\beta$ -caryophyllinic acid 8 | $\beta$ -nocaryophyllinic acid 9 |
|------------|-----------------------------------|-------------------------------------|--------------------------------|----------------------------------|--------------------------------|----------------------------------|
| 0          | 73.14±0.20<br>(74.33±0.21)        | 72.90±0.14<br>(74.78±0.19)          | 73.08±0.37<br>(74.16±0.13)     | 73.01±0.16<br>(74.52±0.09)       | 72.78±0.17<br>(74.65±0.13)     | 72.76±0.09<br>(75.33±0.09)       |
| 0.01       | 68.99±0.08<br>(71.13±0.35)        | 72.87±0.16<br>(74.77±0.07)          | 72.31±0.10<br>(72.88±0.07)     | 72.11±0.08<br>(74.97±0.30)       | 72.77±0.14<br>(74.33±0.16)     | 72.48±0.14<br>(74.18±0.22)       |
| 0.1        | 61.04±0.08<br>(58.18±0.07)        | 71.72±0.11<br>(71.54±0.11)          | 70.69±0.39<br>(61.38±0.07)     | 70.76±0.11<br>(72.69±0.09)       | 72.32±0.16<br>(66.72±0.10)     | 71.69±0.16<br>(73.98±0.13)       |
| 0.2        | 54.58±0.08<br>(53.19±0.06)        | 70.14±0.14<br>(67.96±0.13)          | 64.13±0.10<br>(54.47±0.06)     | 65.91±0.14<br>(70.50±0.69)       | 68.73±0.09<br>(60.68±0.07)     | 71.41±0.13<br>(71.85±0.10)       |
| 0.5        | 49.04±0.06<br>(N/A*)              | 67.94±0.15<br>(62.49±0.16)          | 53.81±0.07<br>(47.62±0.06)     | 57.32±0.07<br>(62.33±0.34)       | 57.52±0.08<br>(51.14±0.34)     | 67.84±0.40<br>(62.56±0.13)       |
| 1          | 46.01±0.05<br>(N/A*)              | 64.19±0.12<br>(58.10±0.09)          | 50.46±0.08<br>(N/A*)           | 50.10±0.07<br>(54.07±0.27)       | 49.72±0.09<br>(44.10±0.06)     | 61.60±0.10<br>(56.08±0.09)       |

  

| Szyszkowski-Langmuir equation fit parameters: $\sigma = \sigma_{blank} - aT \ln(1 + bC)$ where $a = R/\omega$ and $b = K_{ads}$ |                                  |                                |                                  |                                  |                                |                              |
|---------------------------------------------------------------------------------------------------------------------------------|----------------------------------|--------------------------------|----------------------------------|----------------------------------|--------------------------------|------------------------------|
| $a$<br>(mN m <sup>-1</sup> K <sup>-1</sup> )                                                                                    | 0.022 ± 0.003<br>(0.030 ± 0.003) | 4.099 ± SEP<br>(0.033 ± 0.005) | 0.050 ± 0.025<br>(0.034 ± 0.005) | 0.077 ± 0.029<br>(0.178 ± 0.131) | 0.197 ± SEP<br>(0.047 ± 0.004) | 6.047 ± SEP<br>(0.203 ± SEP) |
| $b$<br>(L mmol <sup>-1</sup> )                                                                                                  | 64.6 ± 24.8<br>(51.4 ± 10.4)     | 0.007 ± SEP<br>(4.7 ± 1.4)     | 4.0 ± 3.5<br>(28.3 ± 9.3)        | 1.8 ± 0.9<br>(0.5 ± 0.4)         | 0.508 ± SEP<br>(8.5 ± 1.6)     | 0.006 ± SEP<br>(0.4 ± SEP)   |
| $\omega$<br>(Å <sup>2</sup> molec <sup>-1</sup> )                                                                               | 61.7 ± 7.1<br>(45.5 ± 3.9)       | 0.3 ± SEP<br>(42.0 ± 7.0)      | 27.6 ± 13.7<br>(40.1 ± 5.5)      | 17.9 ± 6.7<br>(7.8 ± 5.7)        | 7.0 ± SEP<br>(29.5 ± 2.7)      | 0.2 ± SEP<br>(6.8 ± SEP)     |
| $-\Delta G_{ads}^{\circ}$<br>(kJ mol <sup>-1</sup> )                                                                            | 36.8 ± 0.9<br>(36.2 ± 0.6)       | 14.7 ± SEP<br>(30.4 ± 0.8)     | 30.0 ± 2.1<br>(34.8 ± 0.8)       | 28.0 ± 1.3<br>(24.9 ± 2.1)       | 25.0 ± SEP<br>(31.9 ± 0.5)     | 14.2 ± SEP<br>(24.2 ± SEP)   |

## References

1. Pangborn, A. B.; Giardello, M. A.; Grubbs, R. H.; Rosen, R. K.; Timmers, F. J., Safe and Convenient Procedure for Solvent Purification. *Organometallics* **1996**, *15* (5), 1518-1520.
2. Armarego, W. L. F.; Chai, C. L. L., *Purification of Laboratory Chemicals*. 5th Edition ed.; Butterworth-Heinemann: Oxford, 2003.
3. Upshur, M. A.; Strick, B. F.; McNeill, V. F.; Thomson, R. J.; Geiger, F. M., Climate-relevant physical properties of molecular constituents for isoprene-derived secondary organic aerosol material. *Atmos. Chem. Phys.* **2014**, *14* (19), 10731-10740.
4. von Szyszkowski, B., Experimentelle Studien über kapillare Eigenschaften der wasserigen Lösungen von Fettsäuren. (Experimental studies of the capillary properties of aqueous solutions of fatty acids). *Z. Phys. Chem.* **1908**, *64*, 385-414.
5. Saïen, J.; Bahrami, M., Understanding the effect of different size silica nanoparticles and SDS surfactant mixtures on interfacial tension of n-hexane–water. *J. Mol. Liq.* **2016**, *224*, Part A, 158-164.
6. Adamson, A. W.; Gast, A. P., *Physical Chemistry of Surfaces*. 6th ed.; Wiley: New York, 1997.
